# Supplementary material for: Identifying Bioaccumulative Halogenated Organic Compounds Using a Nontargeted Analytical Approach: Seabirds as Sentinels
Source: PubMed Central journal article supplement (PMC4447384; doi:10.1371/journal.pone.0127205), 2015-05-28
Supplement: pone.0127205.s004.pdf [file pone.0127205.s004.pdf]

## San Diego Bay Black Skimmer Eggs

Identifying Bioaccumulative Halogenated Organic Compounds Using a Nontargeted Analytical Approach:  
Seabirds as Sentinels.

Authors: Christopher Millow, Susan A. Mackintosh, Rebecca L. Lewison, Nathan G. Dodder, and Eunha Hoh

Web Reference: <http://OrgMassSpec.github.io>

Prepared: 2015-03-02 18:21:15  
SpecLibBlackSkimmerEgg2014 version 0.1-2  
OrgMassSpecR version 0.4-4  
png version 0.1-7  
R version 3.1.0 (2014-04-10)

Name: Heptachloro-1'-methyl-1,2'-bipyrrole

Class: MBP

Matrix: SD Bay Black Skimmer Egg

In Samples: All

Group: Not Typically Monitored

Comment: Also referred to as Q1.

Instrument: GCxGC-TOF, EI, 70 eV

1D RT, 2D RT (s): 1988.71, 1.561

Quantitative Ion m/z: 316

Elemental Formula: C<sub>9</sub>H<sub>3</sub>Cl<sub>7</sub>N<sub>2</sub>

Source: Natural

Identification: Authentic MS RT

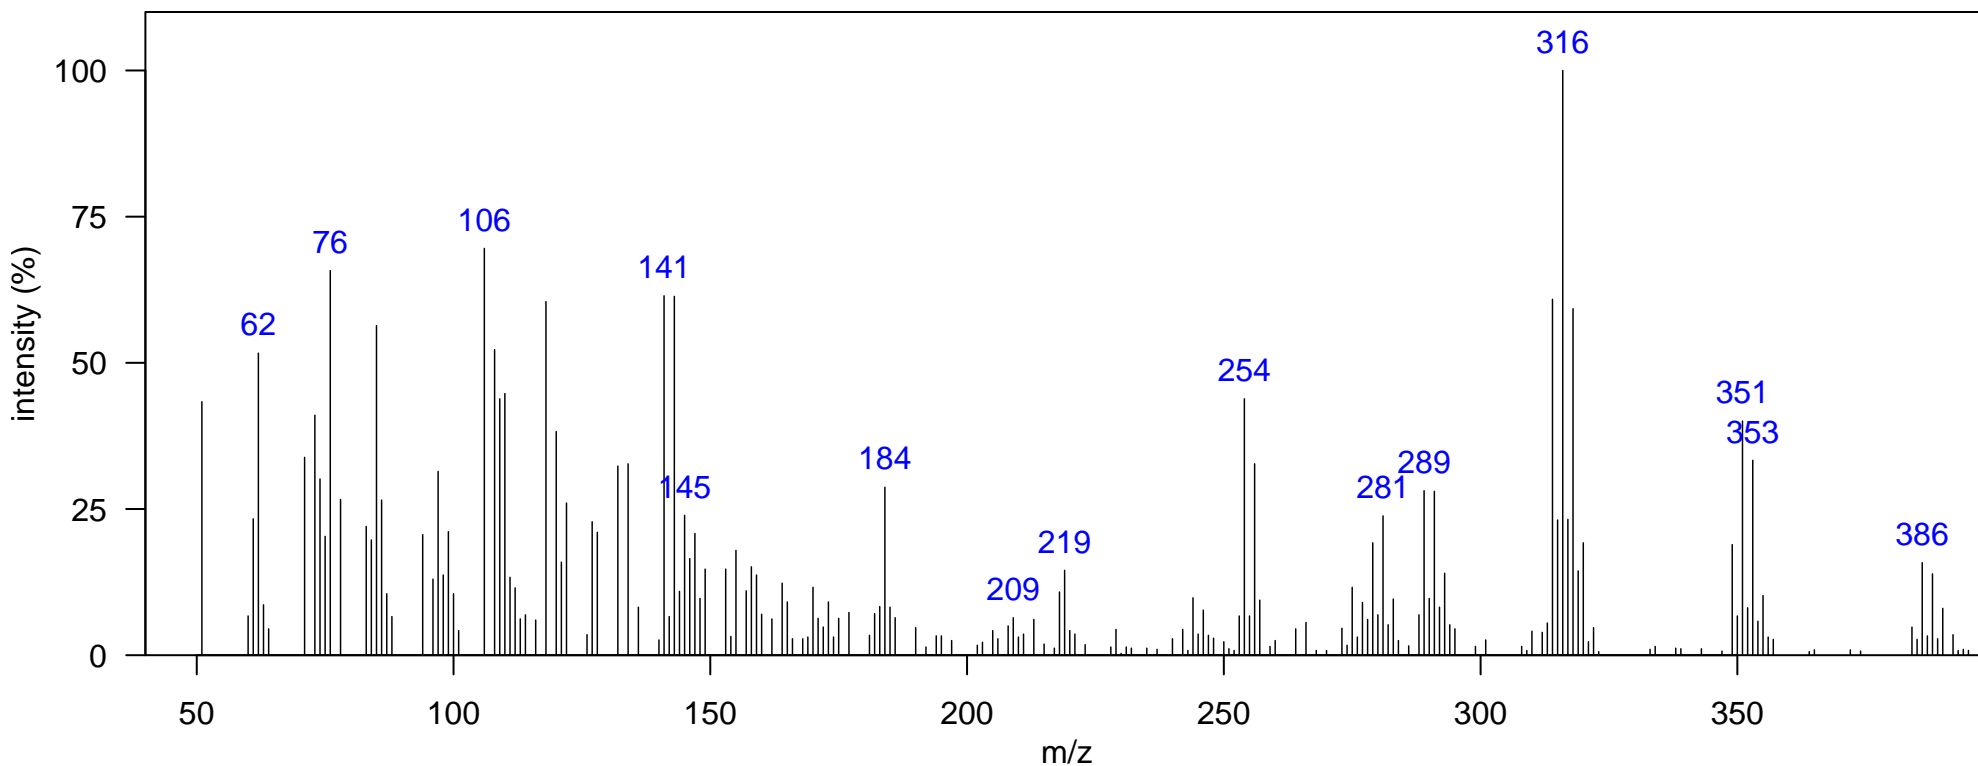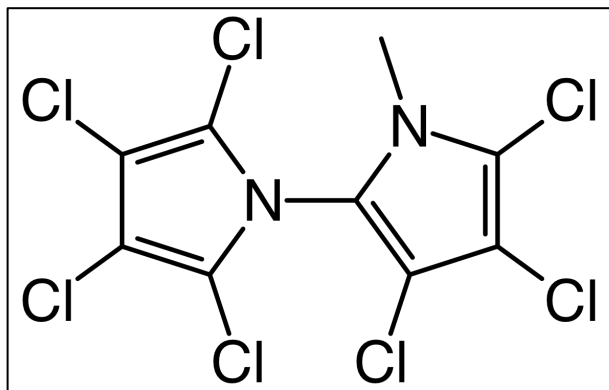

| m/z [Fragment]                        |
|---------------------------------------|
| 314 [M-Cl <sub>2</sub> ] <sup>+</sup> |
| 349 [M-Cl] <sup>+</sup>               |
| 384 M <sup>+</sup>                    |

Name: DDT-related 1

Class: OC pesticide

Matrix: SD Bay Black Skimmer Egg

Instrument: GCxGC-TOF, EI, 70 eV

Elemental Formula: C<sub>7</sub>H<sub>5</sub>ClO

In Samples: A, B, C

1D RT, 2D RT (s): 830.868, 1.32

Source: Anthropogenic

Group: Not Typically Monitored

Quantitative Ion m/z: 139

Identification: Authentic MS RT

Comment: NIST I.D. is 2-Chlorobenzaldehyde. Detected in DDT tech. mix.

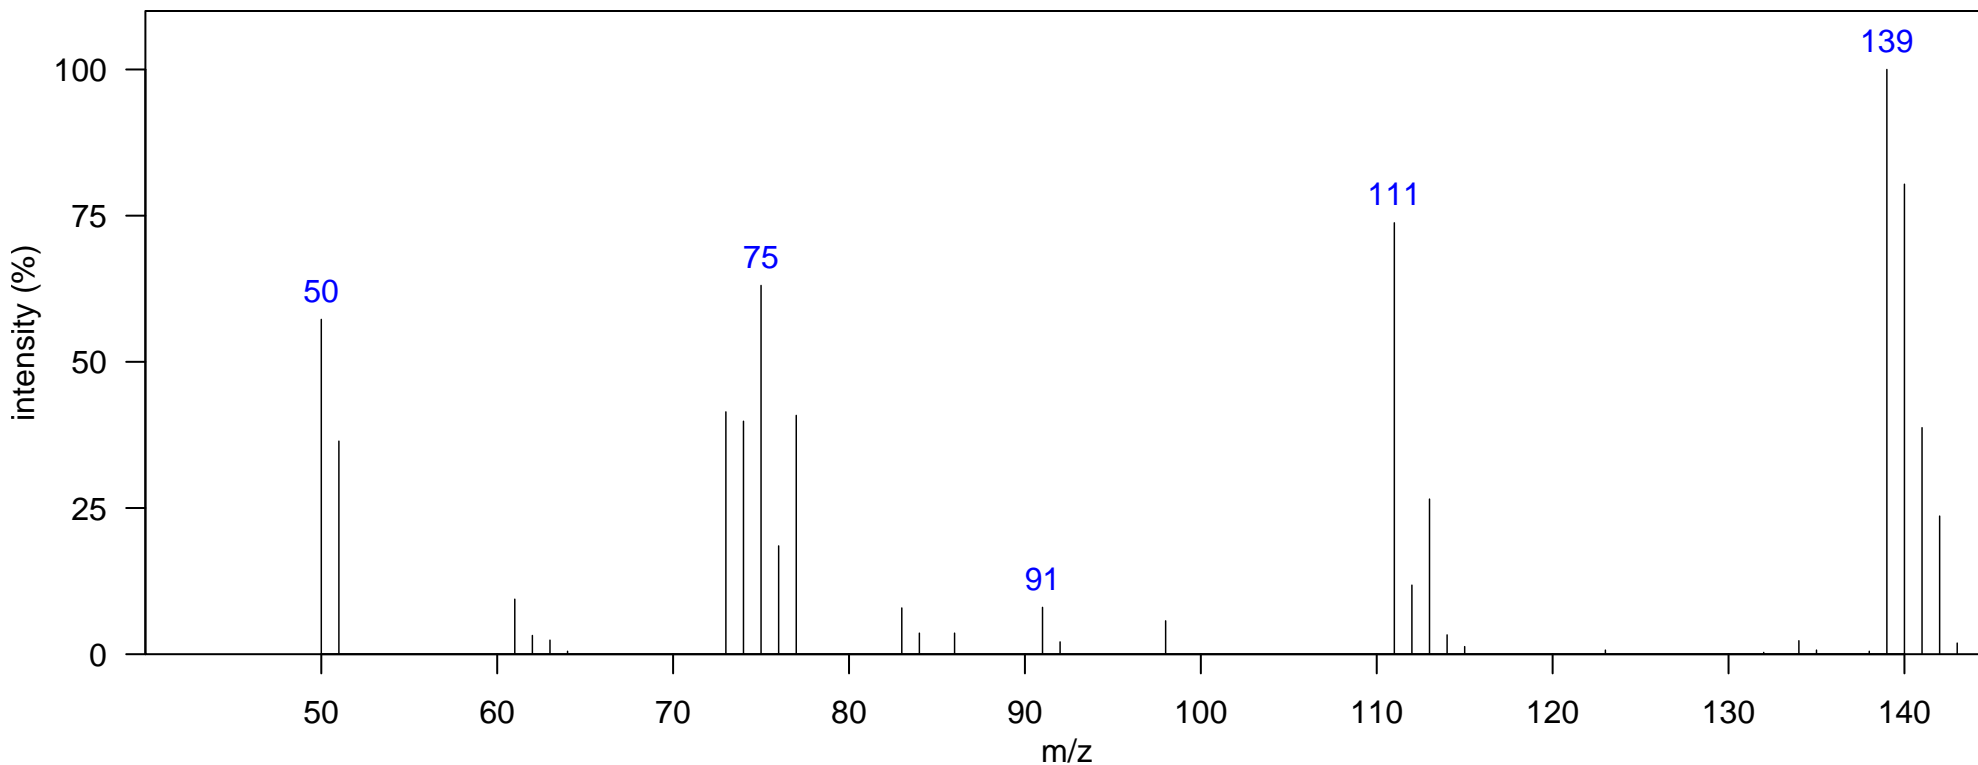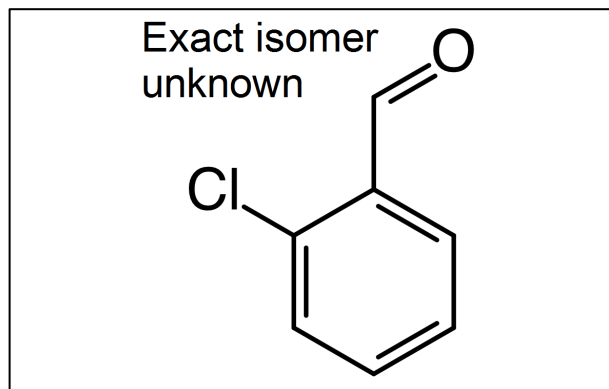

| m/z [Fragment]            |
|---------------------------|
| 76 [M-CHClO] <sup>+</sup> |
| 112 [M-CO] <sup>+</sup>   |
| 140 M <sup>+</sup>        |

Name: DDT-related 2

Class: OC pesticide

Matrix: SD Bay Black Skimmer Egg

Instrument: GCxGC-TOF, EI, 70 eV

Elemental Formula: C<sub>9</sub>H<sub>4</sub>ClO

In Samples: A, B

1D RT, 2D RT (s): 1114.21, 1.327

Source: Anthropogenic

Group: Not Typically Monitored

Quantitative Ion m/z: 139

Identification: Reference Database MS

Comment: NIST I.D. is m-Chloropropiophenone.

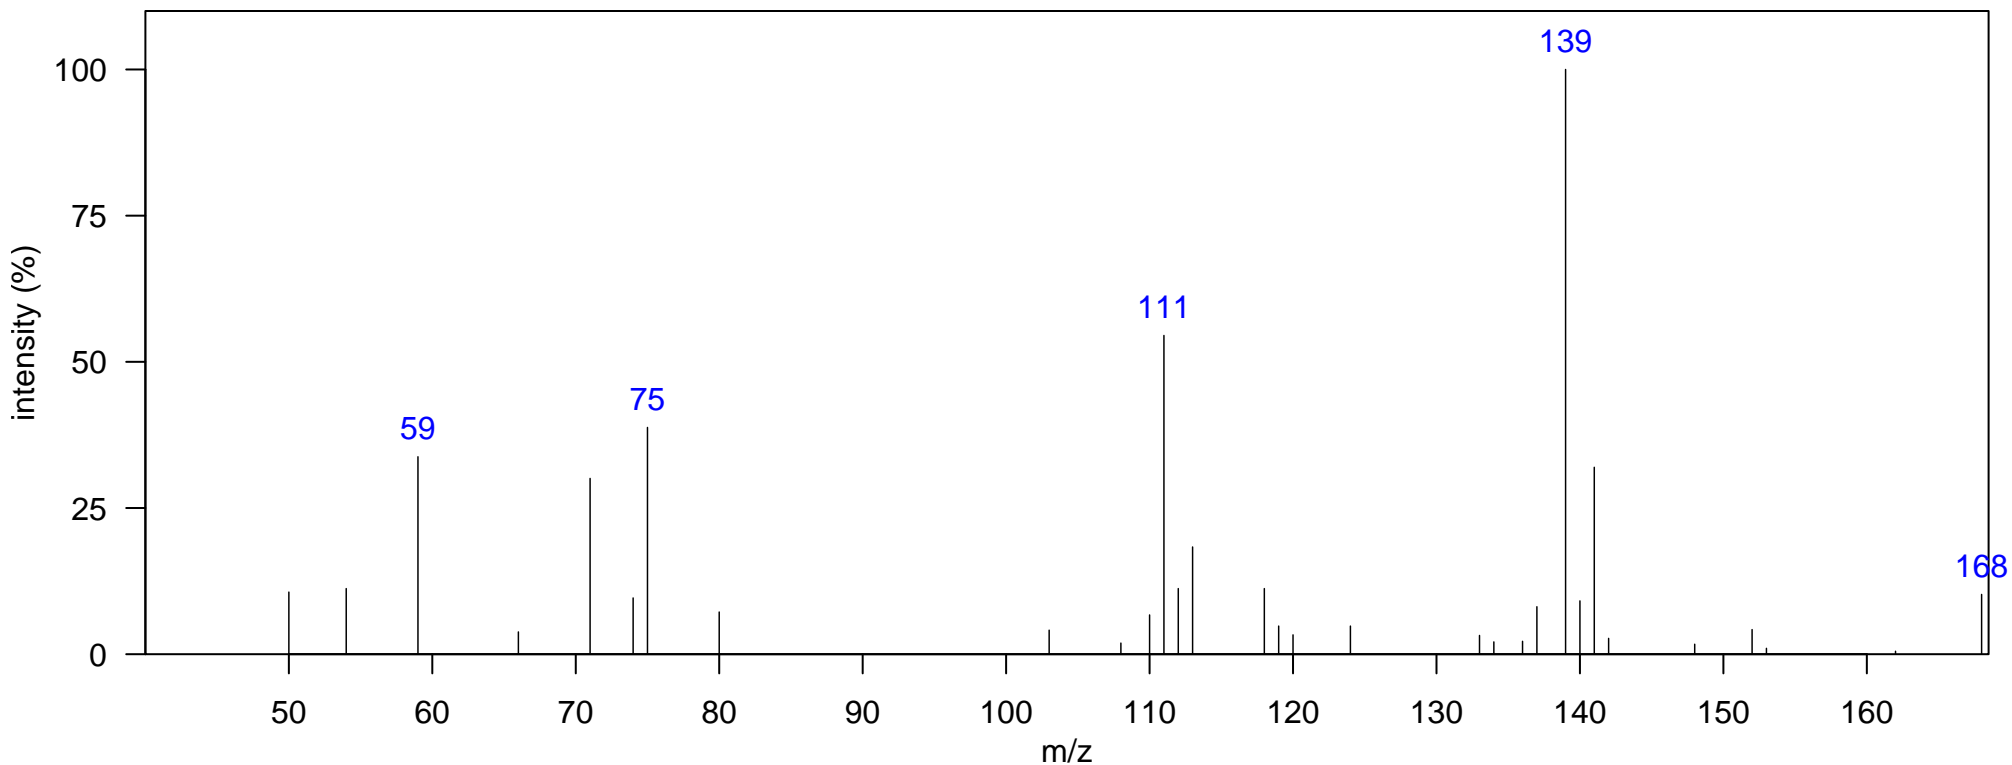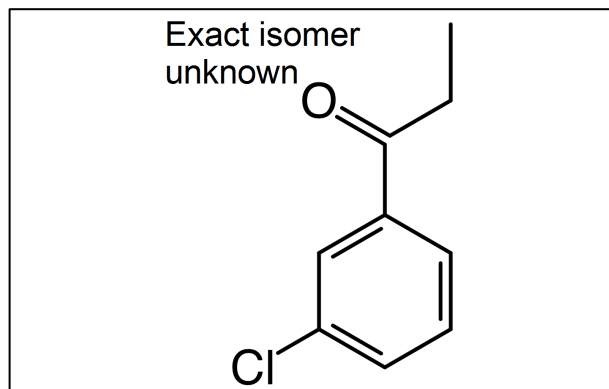

| m/z [Fragment]                                       |
|------------------------------------------------------|
| 112 [M-C <sub>3</sub> H <sub>4</sub> O] <sup>+</sup> |
| 140 [M-C <sub>2</sub> H <sub>4</sub> ] <sup>+</sup>  |
| 168 M <sup>+</sup>                                   |

Name: 1,1-Bis(p-chlorophenyl)-ethane (DDeT)

Class: OC pesticide

Matrix: SD Bay Black Skimmer Egg

Instrument: GCxGC-TOF, EI, 70 eV

Elemental Formula: C<sub>14</sub>H<sub>12</sub>Cl<sub>2</sub>

In Samples: A, B

1D RT, 2D RT (s): 1778.83, 1.485

Source: Anthropogenic

Group: Not Typically Monitored

Quantitative Ion m/z: 235

Identification: Reference Database MS

Comment: NIST I.D. is 1,1-Bis(p-chlorophenyl)ethane.

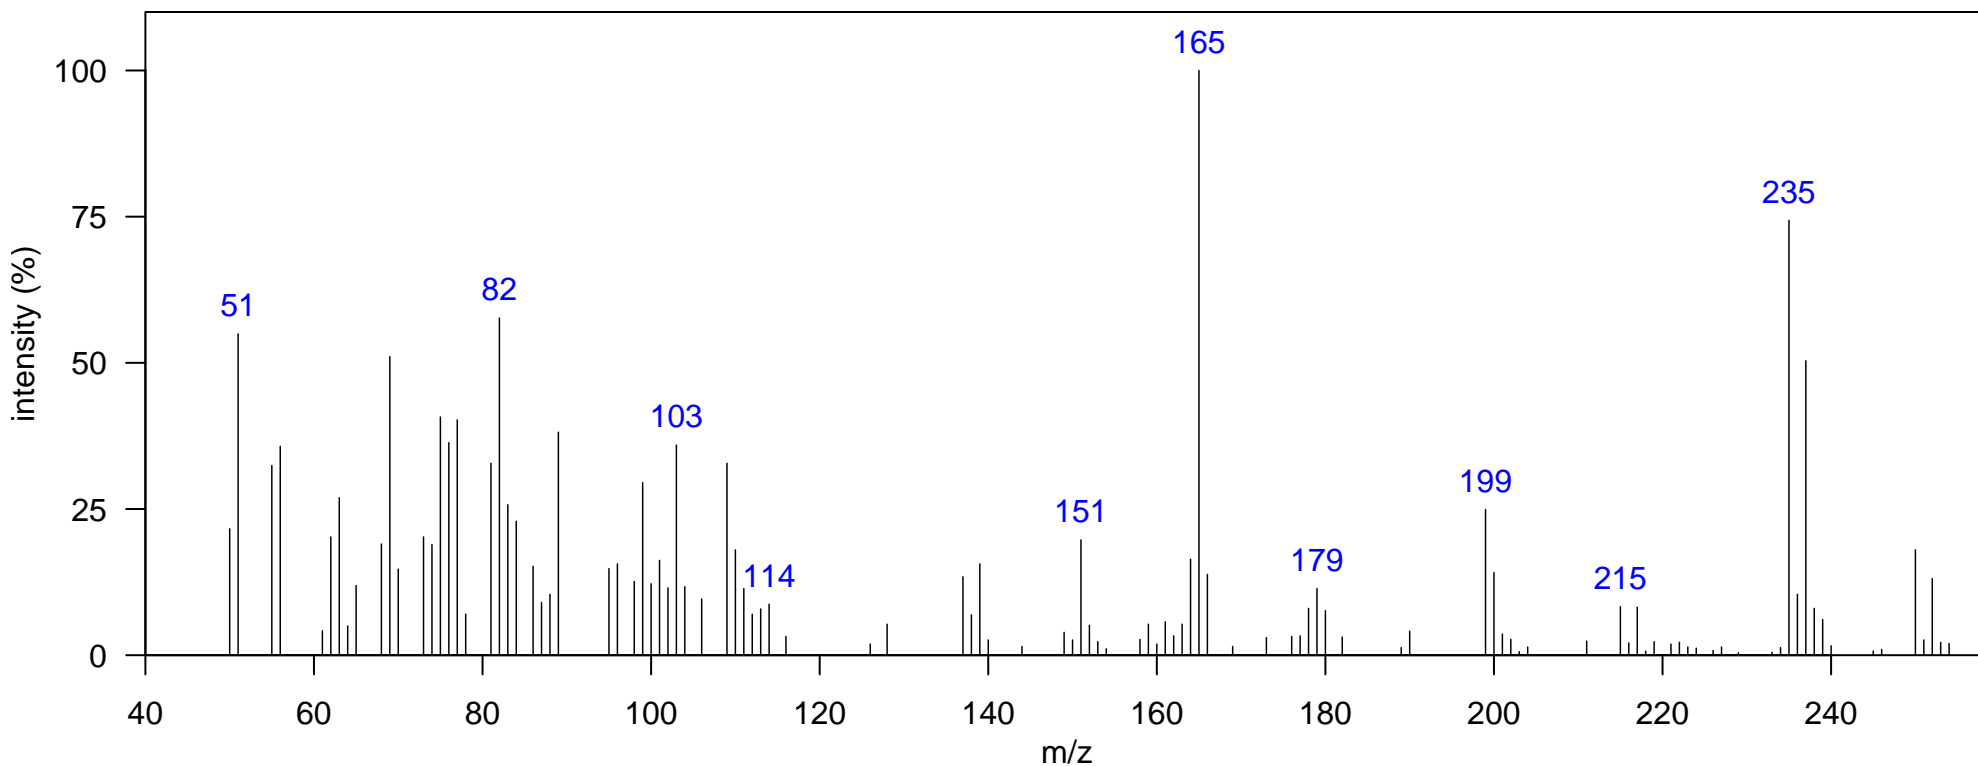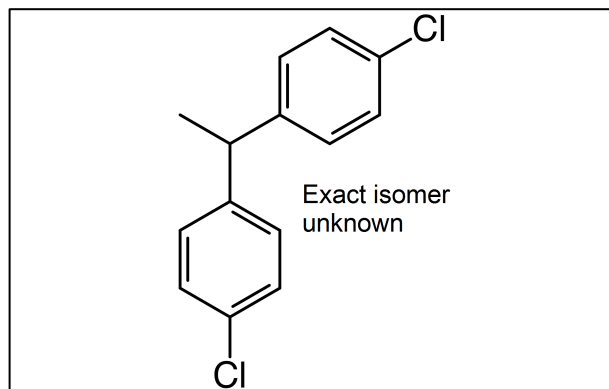

| m/z [Fragment]                                        |
|-------------------------------------------------------|
| 165 [M-CH <sub>3</sub> Cl <sub>2</sub> ] <sup>+</sup> |
| 235 [M-CH <sub>3</sub> ] <sup>+</sup>                 |
| 250 M <sup>+</sup>                                    |

Name: Chlordane Related 1

Class: OC pesticide

Matrix: SD Bay Black Skimmer Egg

Instrument: GCxGC-TOF, EI, 70 eV

Elemental Formula: C<sub>10</sub>H<sub>6</sub>Cl<sub>8</sub>

In Samples: All

1D RT, 2D RT (s): 1950.23, 1.498

Source: Anthropogenic

Group: Not Typically Monitored

Quantitative Ion m/z: 238

Identification: Literature MS

Comment: M<sup>+</sup> is not detected. Tentatively identified as U82 (Environ. Sci. Technol., 1999, 33, 1353-1358).

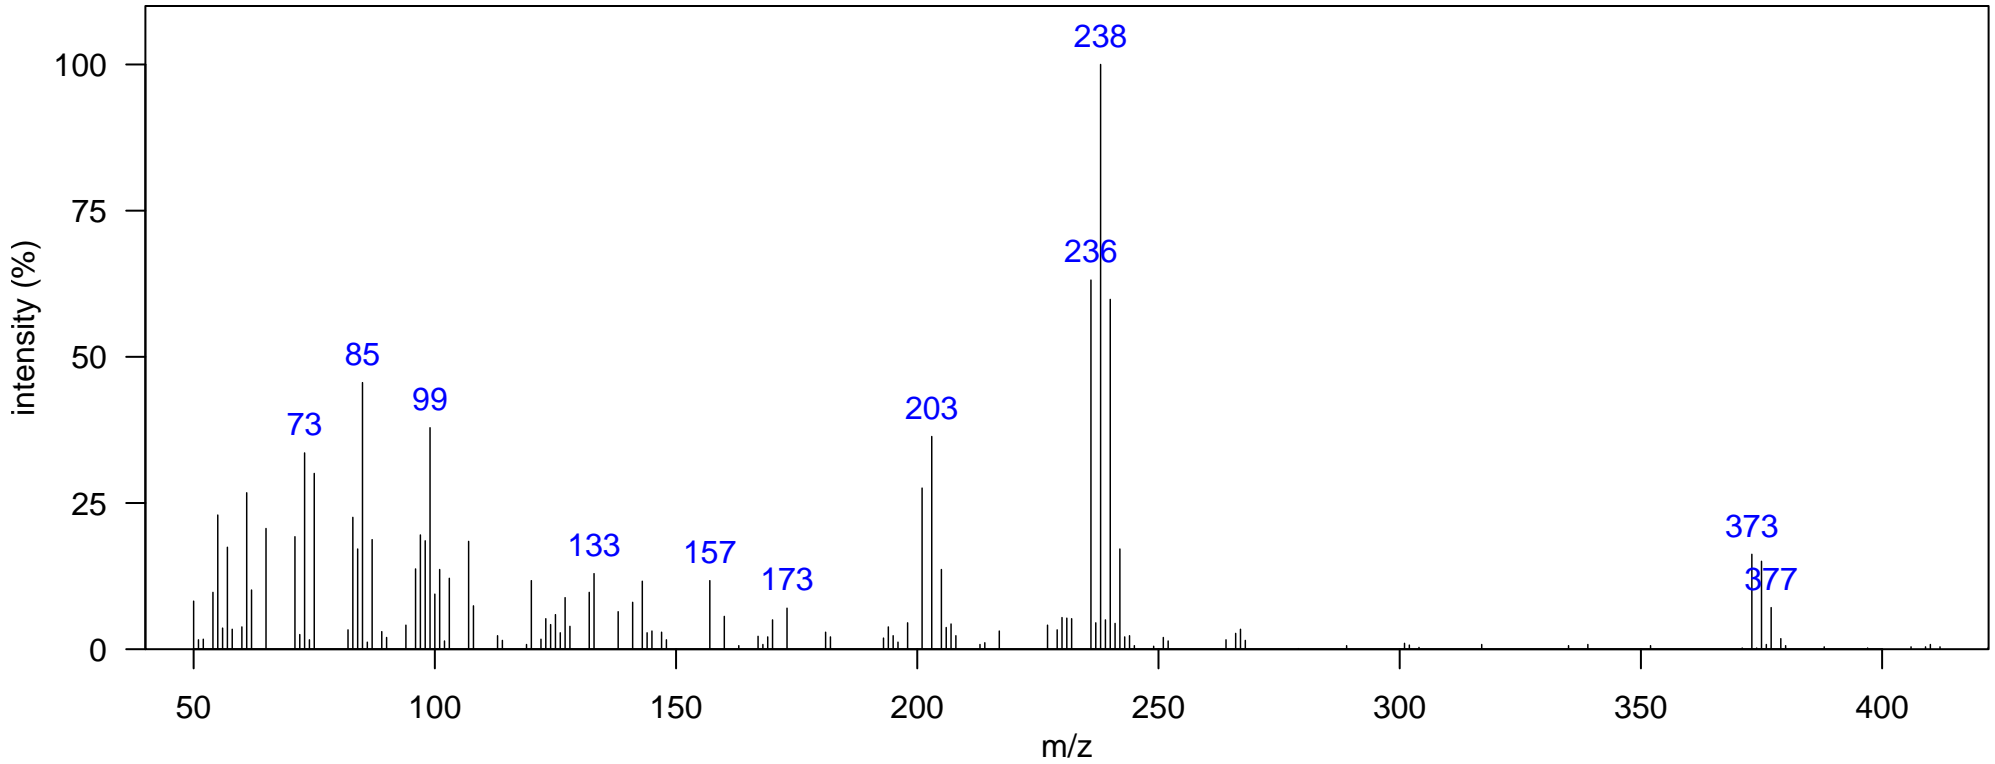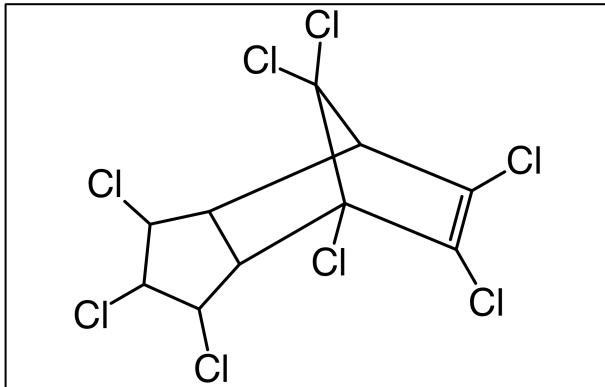

| m/z [Fragment]                                      |
|-----------------------------------------------------|
| 236 [C <sub>5</sub> HCl <sub>5</sub> ] <sup>+</sup> |
| 371 [M-Cl] <sup>+</sup>                             |
| 406 M <sup>+</sup>                                  |

Name: Chlordane Related 2

Class: OC pesticide

Matrix: SD Bay Black Skimmer Egg

Instrument: GCxGC-TOF, EI, 70 eV

Elemental Formula: C<sub>10</sub>H<sub>7</sub>Cl<sub>7</sub>

In Samples: All

1D RT, 2D RT (s): 1957.22, 1.67

Source: Anthropogenic

Group: Not Typically Monitored

Quantitative Ion m/z: 339

Identification: Manual Congener Group

Comment: Ion cluster at m/z 339 suggests C<sub>10</sub>H<sub>6</sub>Cl<sub>6</sub>. M<sup>+</sup> not detected.

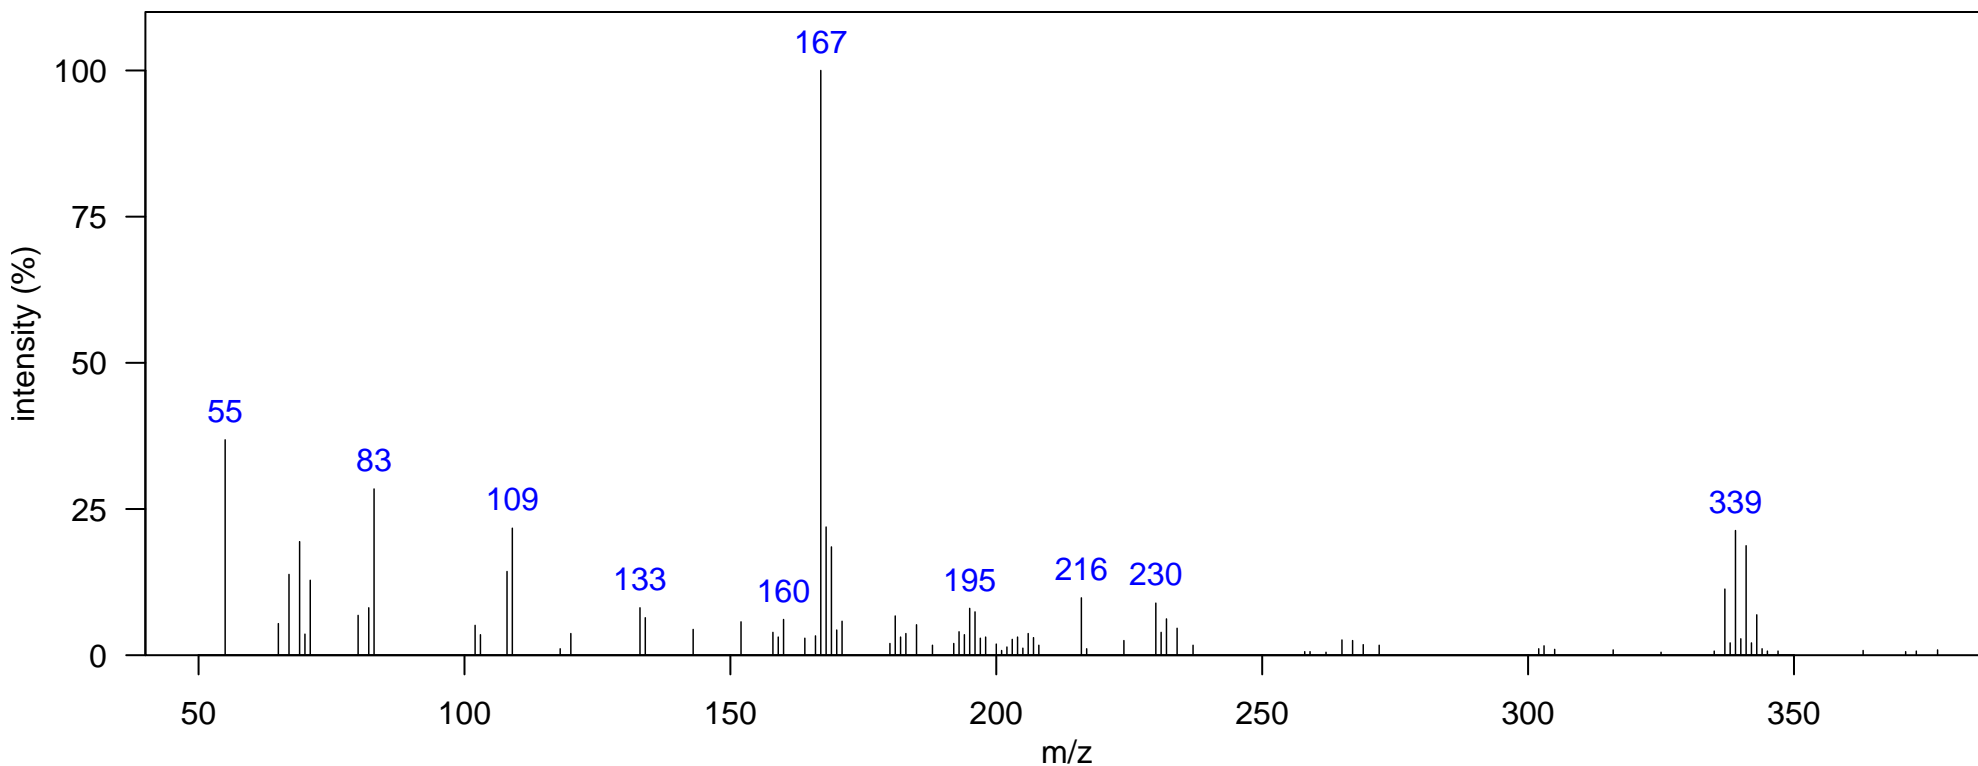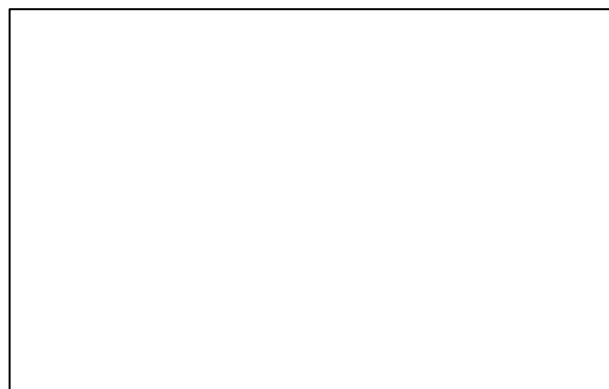

| m/z [Fragment]          |
|-------------------------|
| 337 [M-Cl] <sup>+</sup> |
| 372 M <sup>+</sup>      |

Name: DDT-related 3

Class: OC pesticide

Matrix: SD Bay Black Skimmer Egg

Instrument: GCxGC-TOF, EI, 70 eV

Elemental Formula: C<sub>14</sub>H<sub>12</sub>Cl<sub>3</sub>

In Samples: A, B, C

1D RT, 2D RT (s): 1999.2, 1.663

Source: Anthropogenic

Group: Not Typically Monitored

Quantitative Ion m/z: 235

Identification: Reference Database MS

Comment: NIST I.D. is 1-Chloro-2,2-Bis(p-chlorophenyl)ethane.

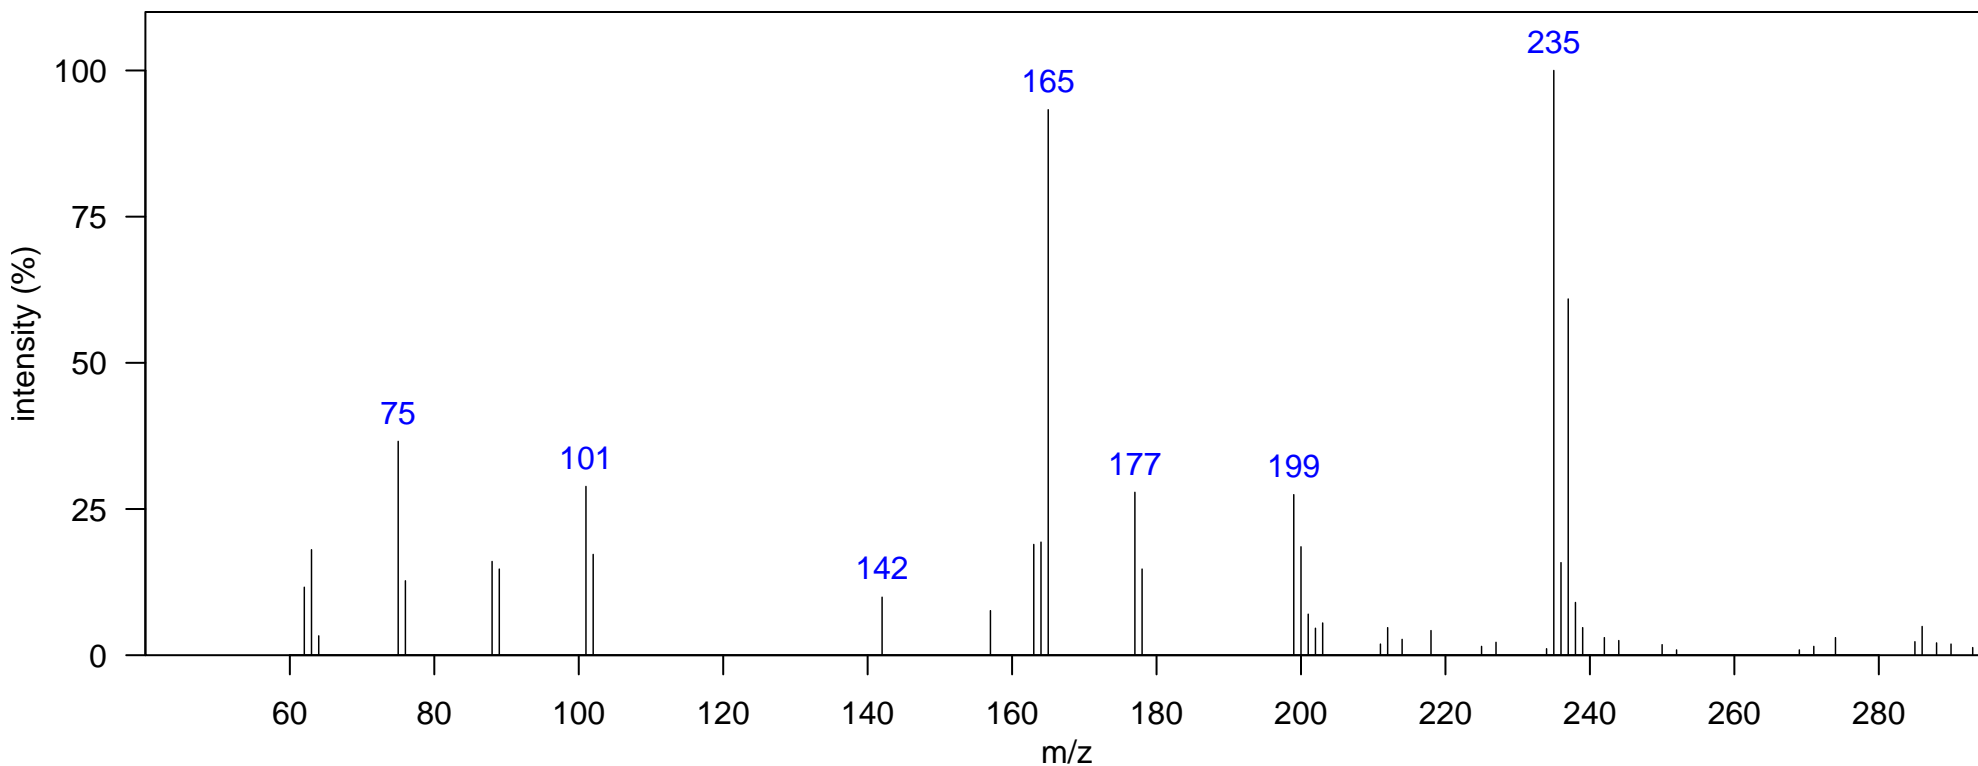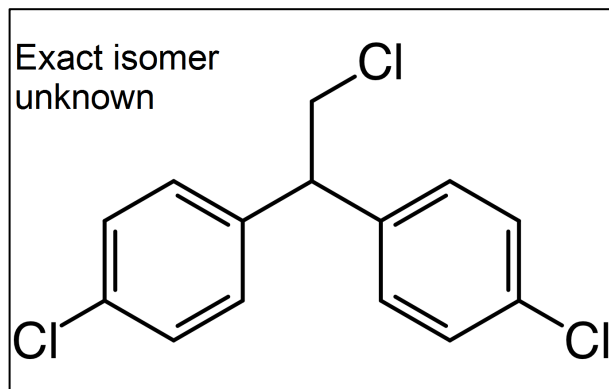

| m/z [Fragment]                                        |
|-------------------------------------------------------|
| 166 [M-CH <sub>2</sub> Cl <sub>3</sub> ] <sup>+</sup> |
| 201 [M-CH <sub>2</sub> Cl <sub>2</sub> ] <sup>+</sup> |
| 236 [M-CH <sub>2</sub> Cl] <sup>+</sup>               |
| 285 M <sup>+</sup>                                    |



Name: DDT-related 4

Class: OC pesticide

Matrix: SD Bay Black Skimmer Egg

In Samples: All

Group: Not Typically Monitored

Comment: DDE Isomer.

Instrument: GCxGC-TOF, EI, 70 eV

1D RT, 2D RT (s): 2051.67, 1.597

Quantitative Ion m/z: 318

Elemental Formula: C<sub>14</sub>H<sub>8</sub>Cl<sub>4</sub>

Source: Anthropogenic

Identification: Authentic MS

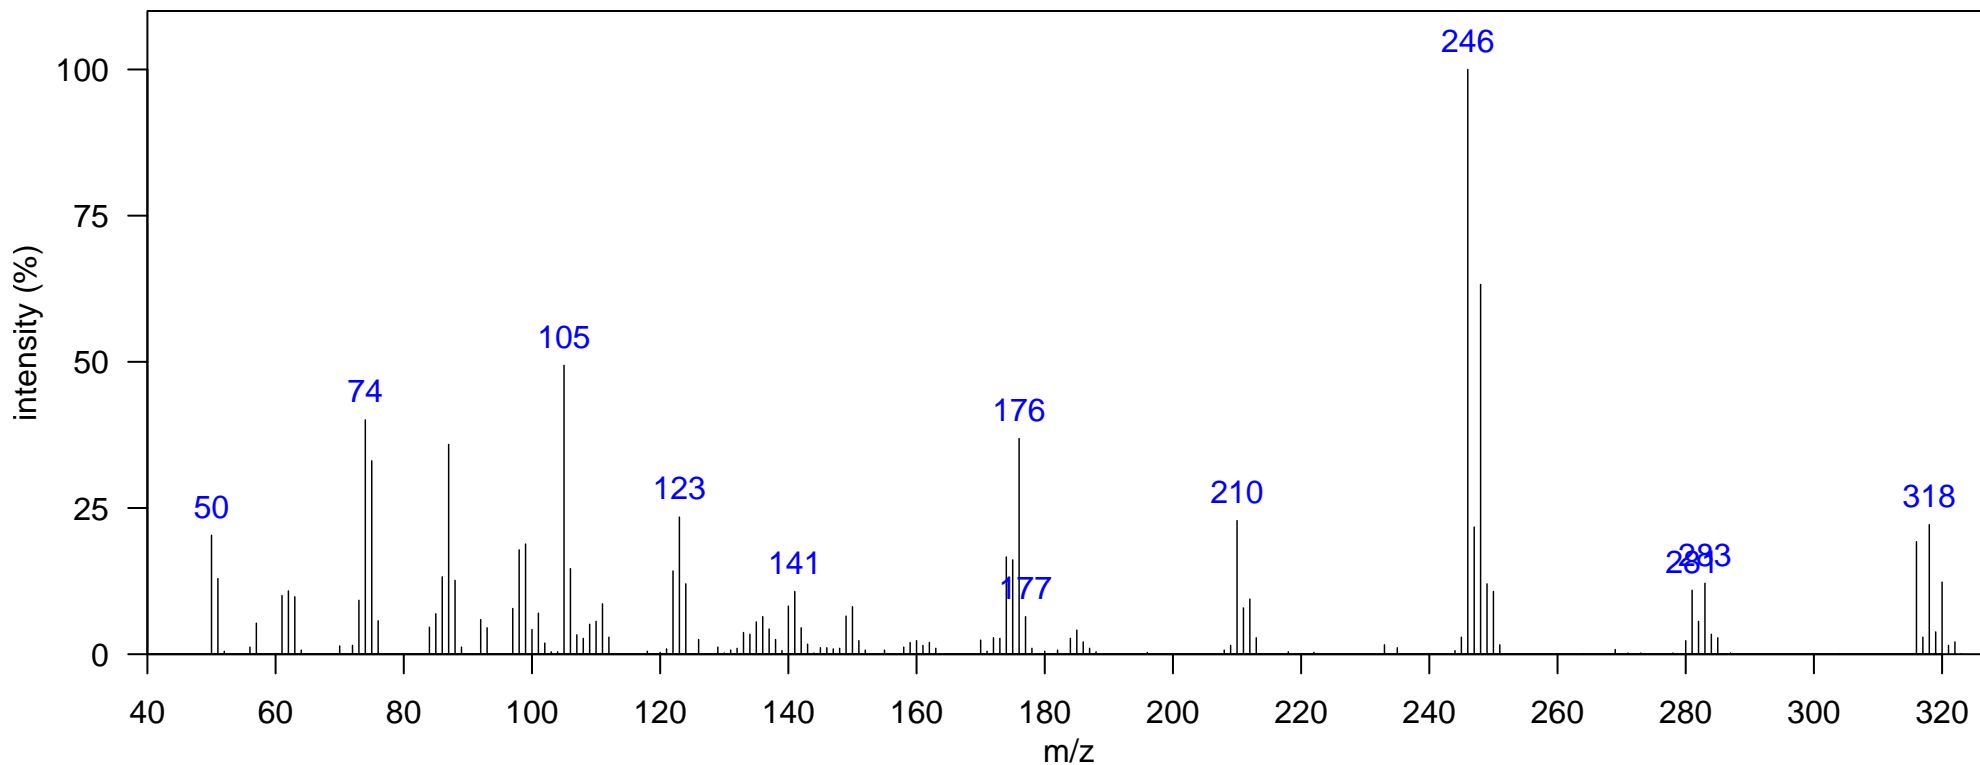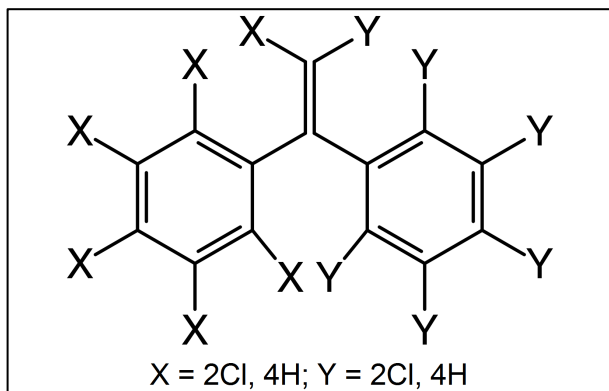

| m/z [Fragment]                        |
|---------------------------------------|
| 176 [M-C <sub>14</sub> ] <sup>+</sup> |
| 211 [M-C <sub>13</sub> ] <sup>+</sup> |
| 246 [M-C <sub>12</sub> ] <sup>+</sup> |
| 280 [M-Cl] <sup>+</sup>               |
| 316 M <sup>+</sup>                    |

Name: Tris(4-chlorophenyl)methane (TCPM)

Class: OC pesticide

Matrix: SD Bay Black Skimmer Egg

Instrument: GCxGC-TOF, EI, 70 eV

Elemental Formula: C<sub>19</sub>H<sub>13</sub>Cl<sub>3</sub>

In Samples: All

1D RT, 2D RT (s): 2397.97, 1.855

Source: Anthropogenic

Group: Not Typically Monitored

Quantitative Ion m/z: 311

Identification: Authentic MS RT

Comment:

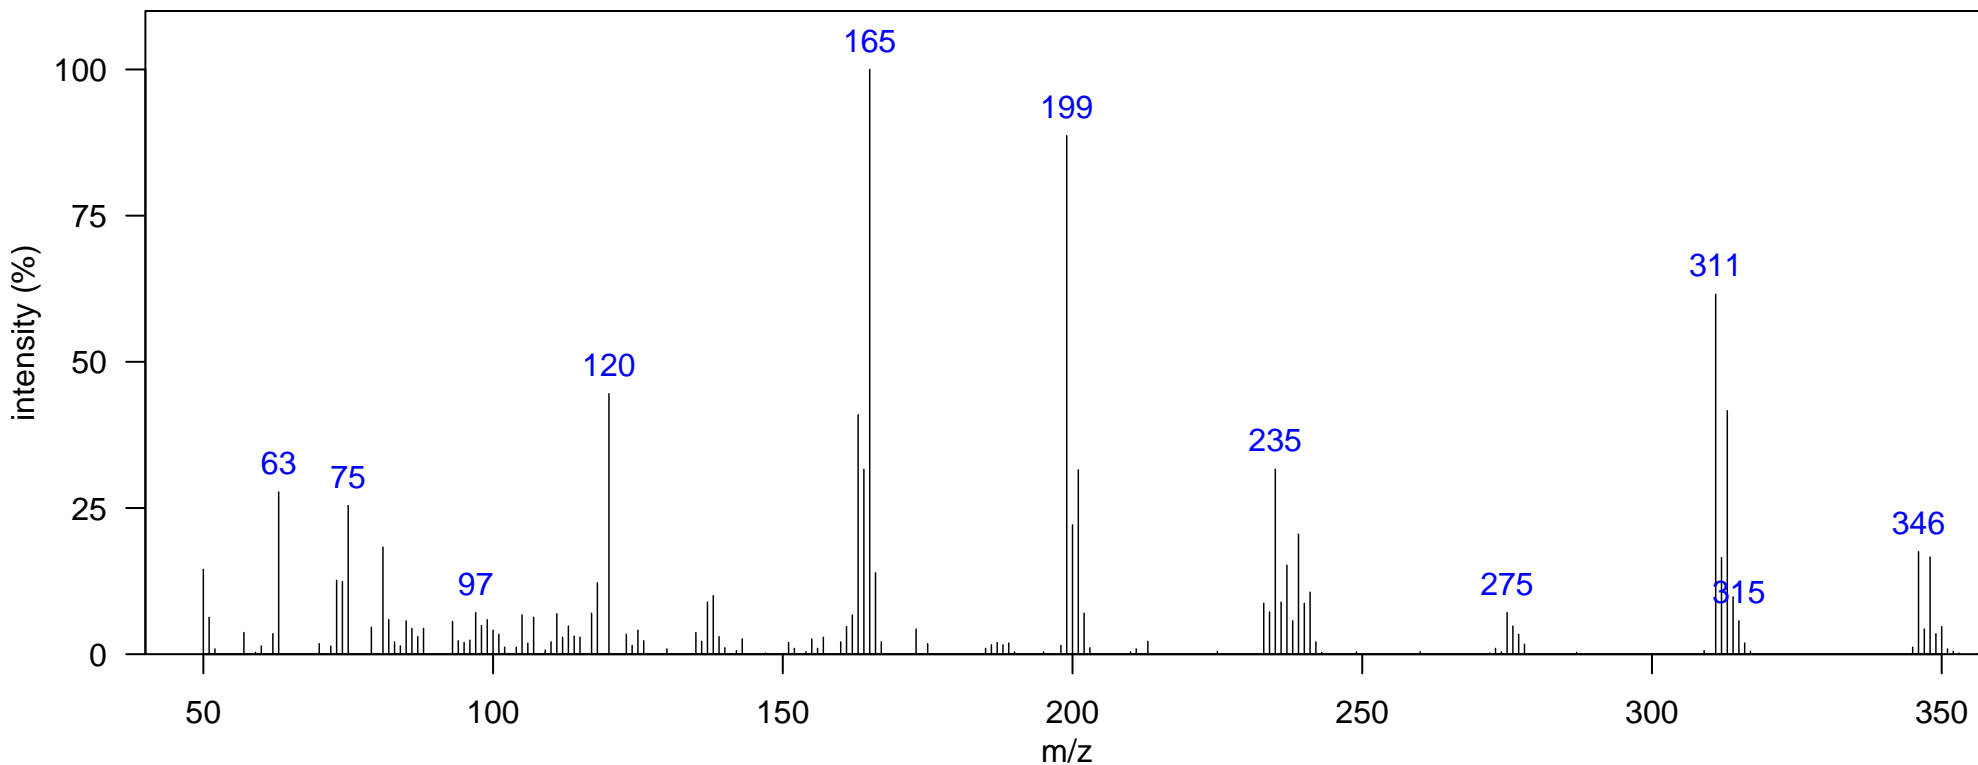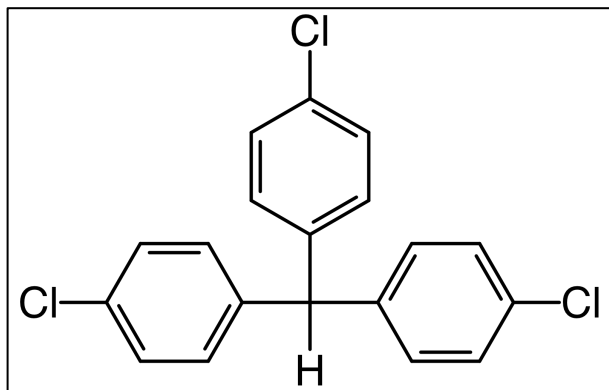

| m/z [Fragment]                         |
|----------------------------------------|
| 275 [M-HCl <sub>2</sub> ] <sup>+</sup> |
| 311 [M-Cl] <sup>+</sup>                |
| 346 M <sup>+</sup>                     |

Name: Tris(4-chlorophenyl)methanol (TCPMOH)

Class: OC pesticide

Matrix: SD Bay Black Skimmer Egg

In Samples: All

Group: Not Typically Monitored

Comment: M+ is not detected.

Instrument: GCxGC-TOF, EI, 70 eV

1D RT, 2D RT (s): 2499.41, 2.125

Quantitative Ion m/z: 139

Elemental Formula: C<sub>19</sub>H<sub>13</sub>Cl<sub>3</sub>O

Source: Anthropogenic

Identification: Authentic MS RT

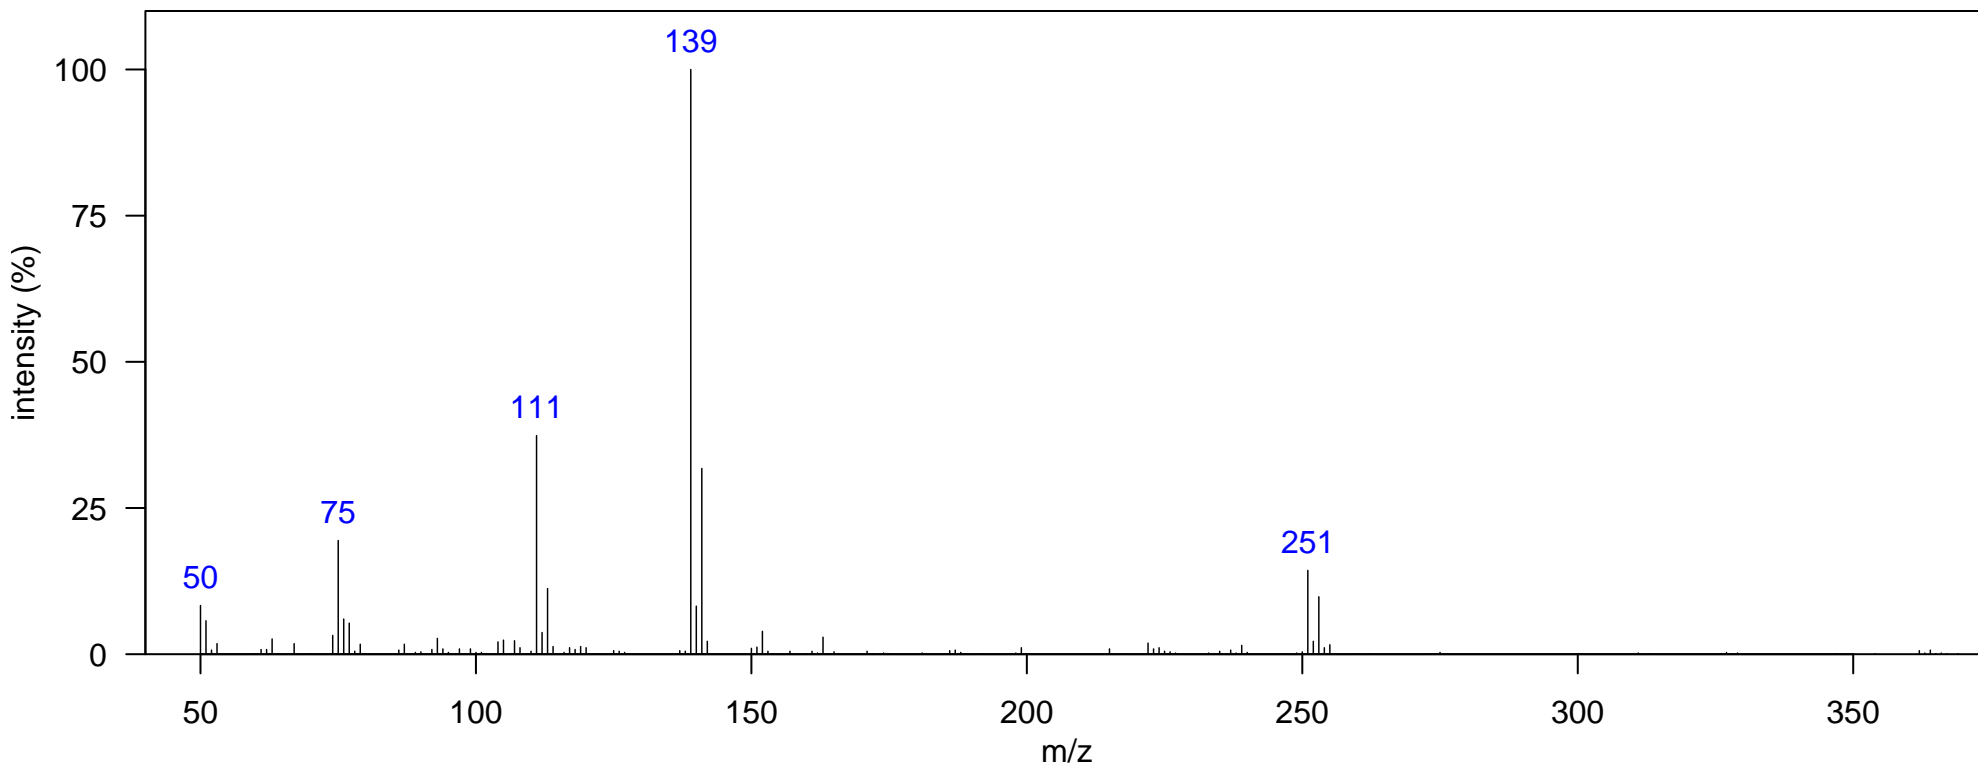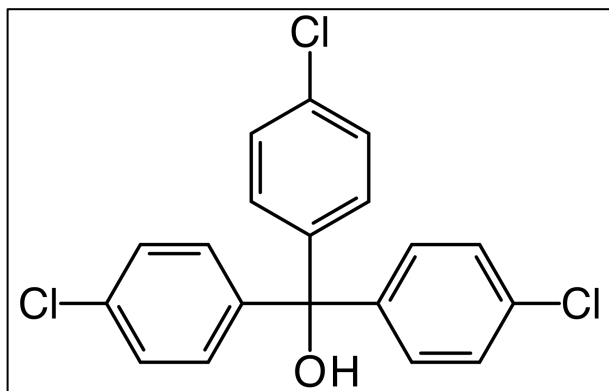

| m/z [Fragment]                                         |
|--------------------------------------------------------|
| 251 [M-C <sub>2</sub> HCl <sub>2</sub> O] <sup>+</sup> |
| 311 [M-HClO] <sup>+</sup>                              |
| 362 M <sup>+</sup>                                     |

Name: Methylmercuric iodide

Class: Other

Matrix: SD Bay Black Skimmer Egg

In Samples: A, B, C

Group: Not Typically Monitored

Comment: NIST I.D. is Methylmercuric iodide. Formula is CH<sub>3</sub>HgI.

Instrument: GCxGC-TOF, EI, 70 eV

1D RT, 2D RT (s): 753.912, 1.551

Quantitative Ion m/z: 329

Elemental Formula:

Source: Unknown

Identification: Authentic MS RT

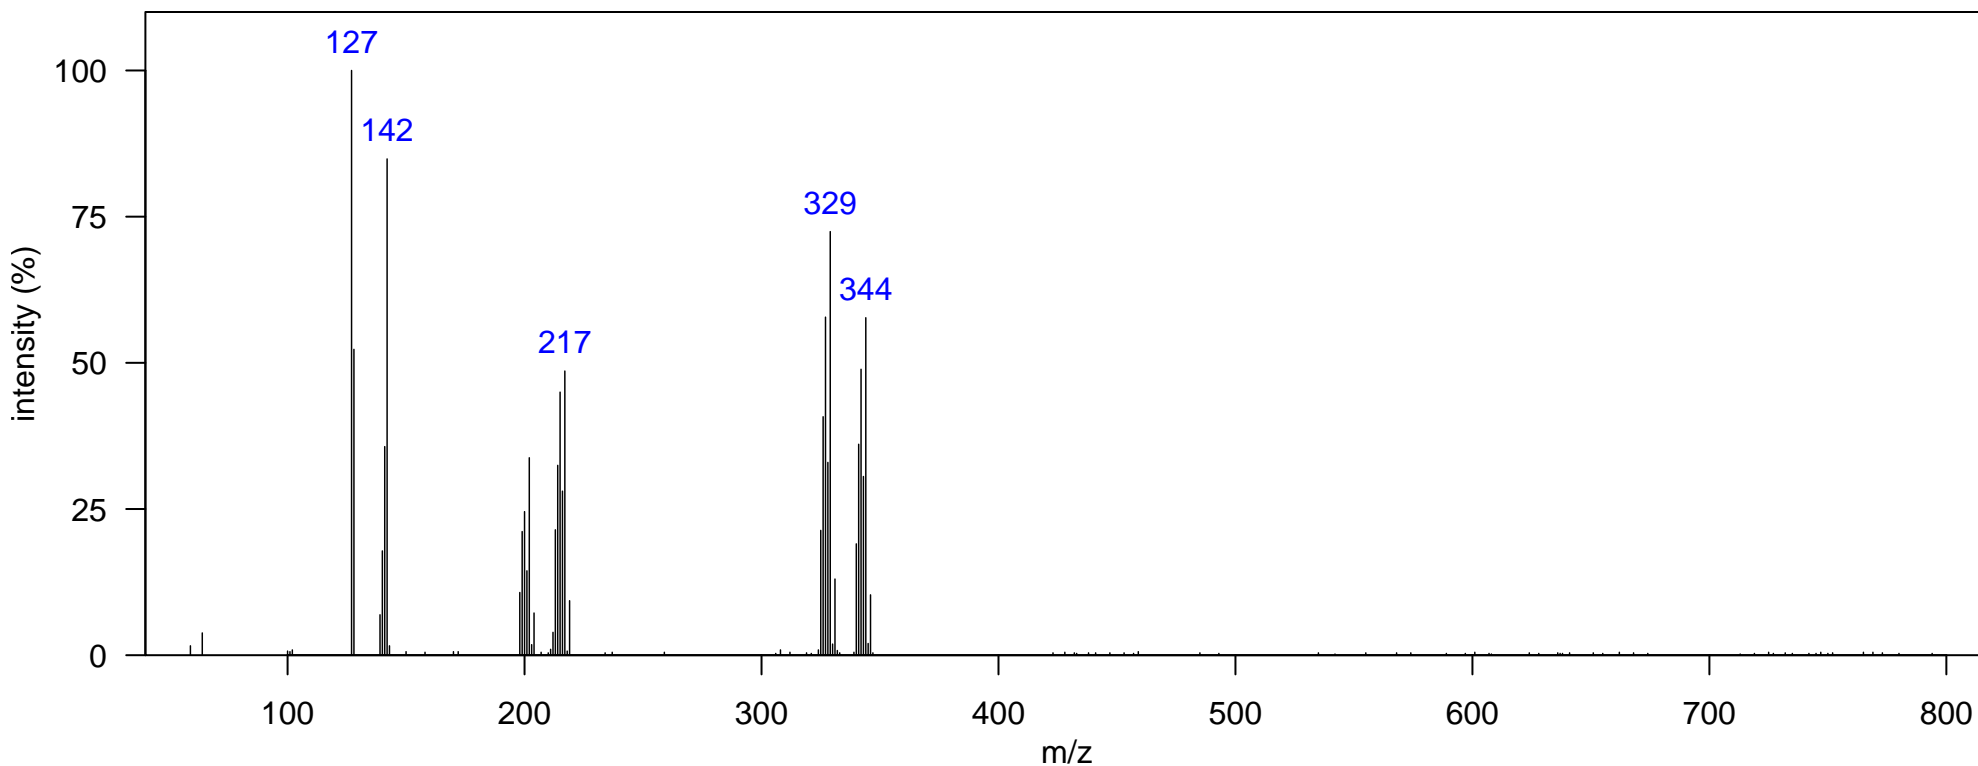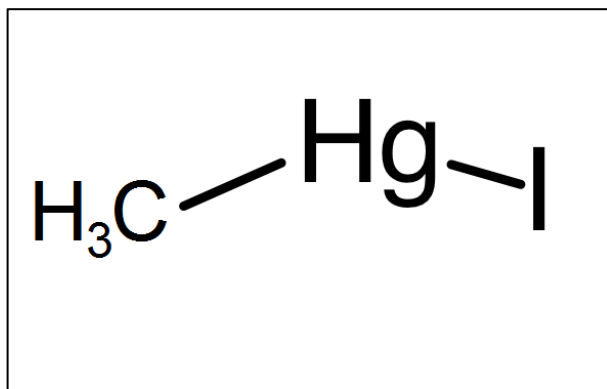

| m/z [Fragment]                        |
|---------------------------------------|
| 325 [M-CH <sub>3</sub> ] <sup>+</sup> |
| 340 M <sup>+</sup>                    |

Name: 2-Bromo-1,3-diphenyl-1,3-propanedione

Class: Other

Matrix: SD Bay Black Skimmer Egg

In Samples: All

Group: Not Typically Monitored

Comment: M+ is not detected.

Instrument: GCxGC-TOF, EI, 70 eV

1D RT, 2D RT (s): 1932.74, 1.67

Quantitative Ion m/z: 223

Elemental Formula: C<sub>15</sub>H<sub>11</sub>BrO<sub>2</sub>

Source: Unknown

Identification: Authentic MS RT

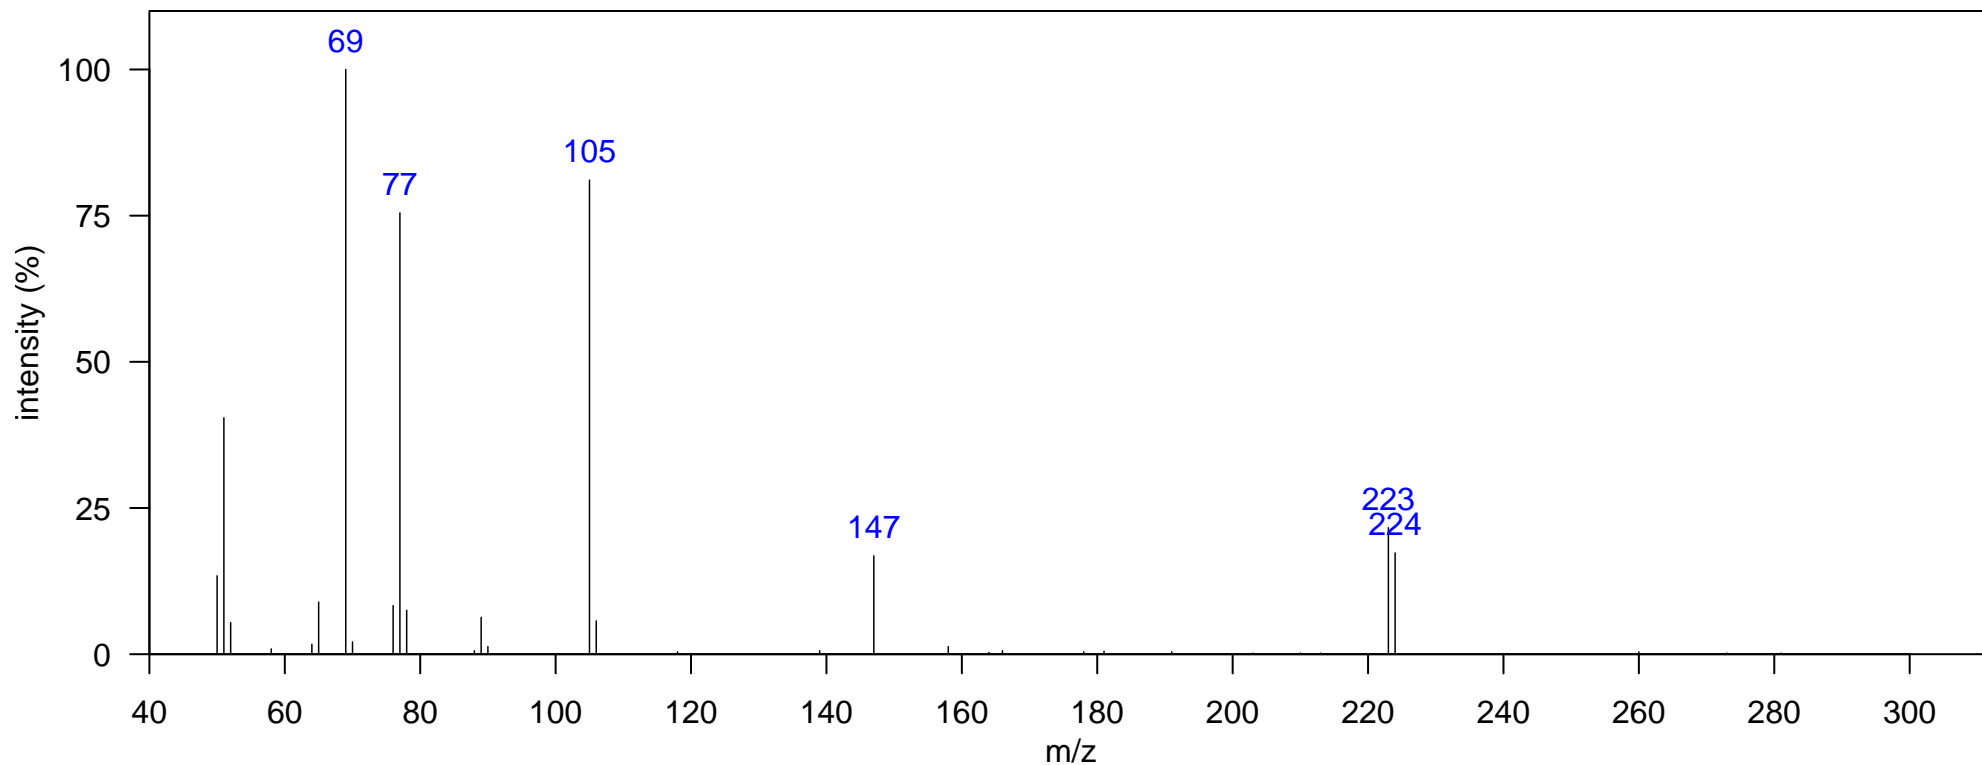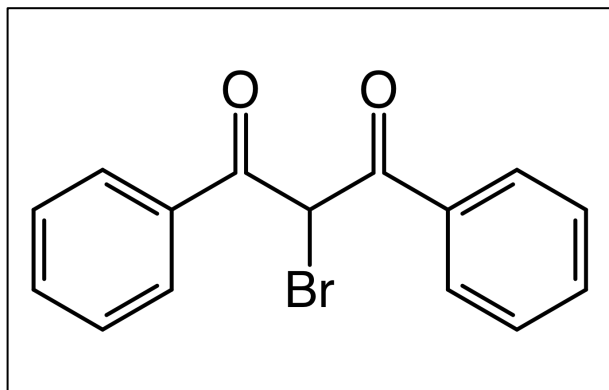

| m/z [Fragment]          |
|-------------------------|
| 223 [M-Br] <sup>+</sup> |
| 302 M <sup>+</sup>      |

Name: p,p'-Dichlorodiphenyl sulfone

Class: Other

Matrix: SD Bay Black Skimmer Egg

In Samples: A, C, D

Group: Not Typically Monitored

Comment:

Instrument: GCxGC-TOF, EI, 70 eV

1D RT, 2D RT (s): 2072.66, 1.855

Quantitative Ion m/z: 159

Elemental Formula: C<sub>12</sub>H<sub>8</sub>Cl<sub>2</sub>O<sub>2</sub>S

Source: Unknown

Identification: Authentic MS RT

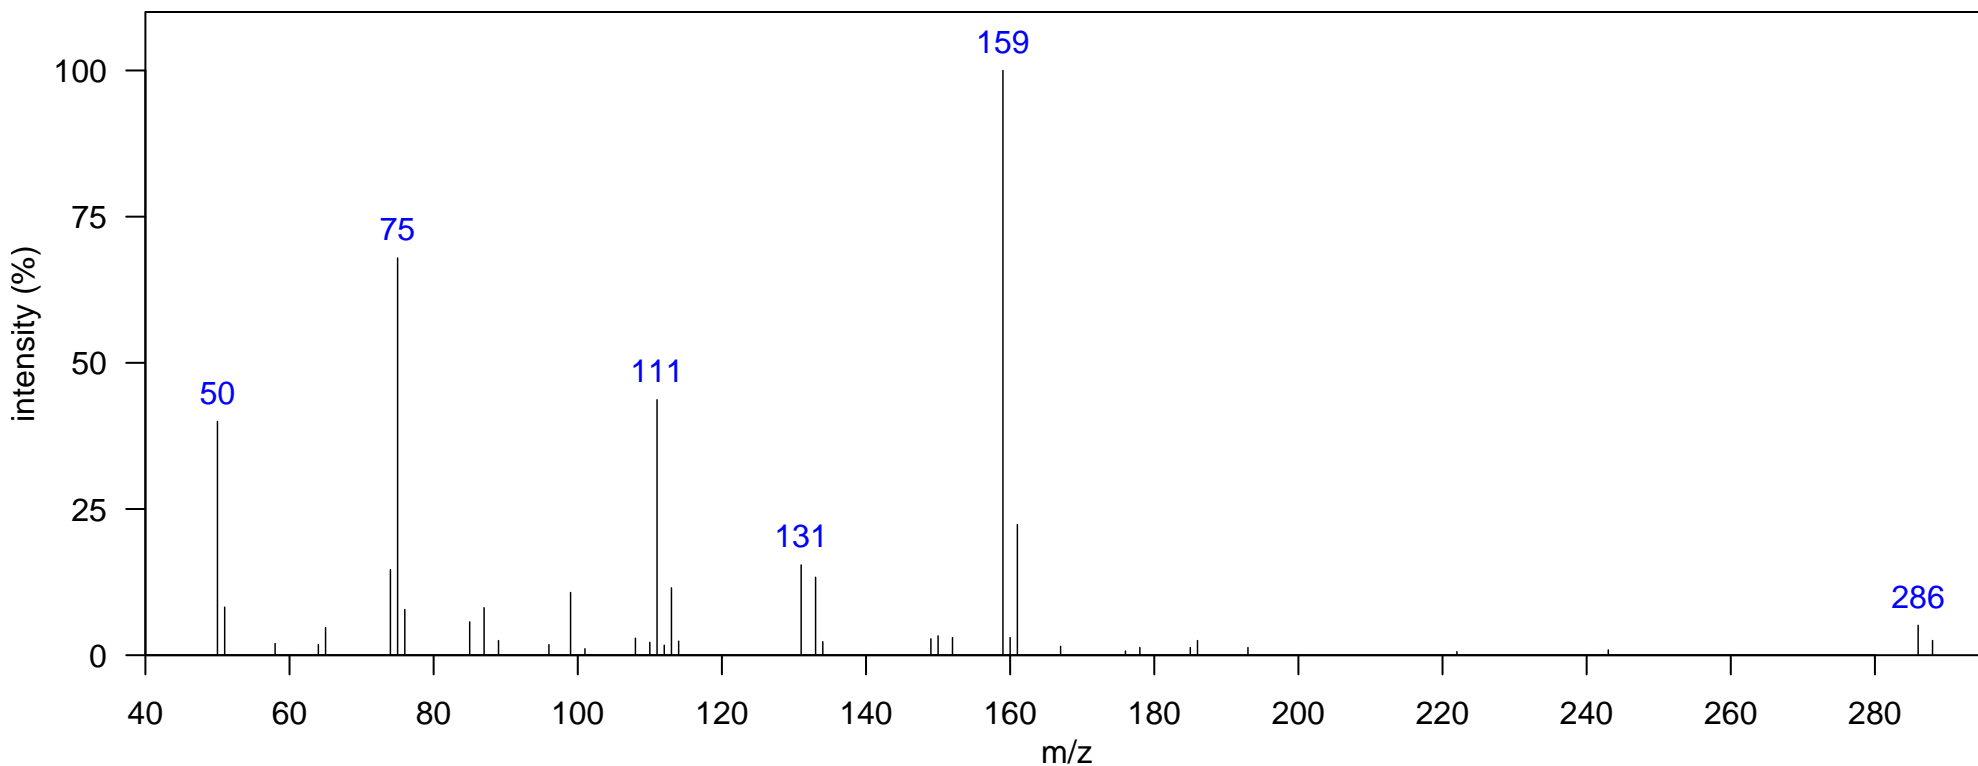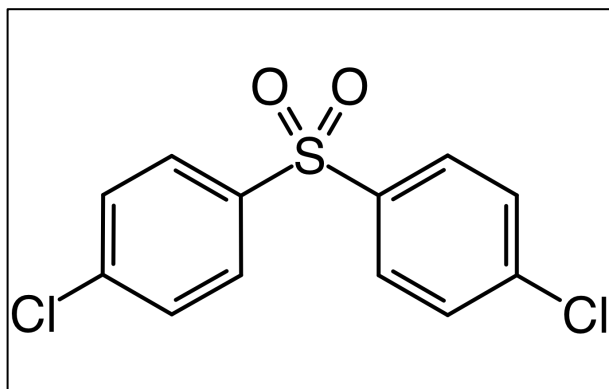

| m/z [Fragment]                                          |
|---------------------------------------------------------|
| 159 [M-C <sub>6</sub> H <sub>4</sub> ClSO] <sup>+</sup> |
| 286 M <sup>+</sup>                                      |

Name: Parachlorophenol

Class: Phenol A

Matrix: SD Bay Black Skimmer Egg

In Samples: A, B, C

Group: Not Typically Monitored

Comment: NIST I.D. is Parachlorophenol.

Instrument: GCxGC-TOF, EI, 70 eV

1D RT, 2D RT (s): 939.306, 1.307

Quantitative Ion m/z: 128

Elemental Formula: C<sub>6</sub>H<sub>5</sub>ClO

Source: Anthropogenic

Identification: Reference Database MS

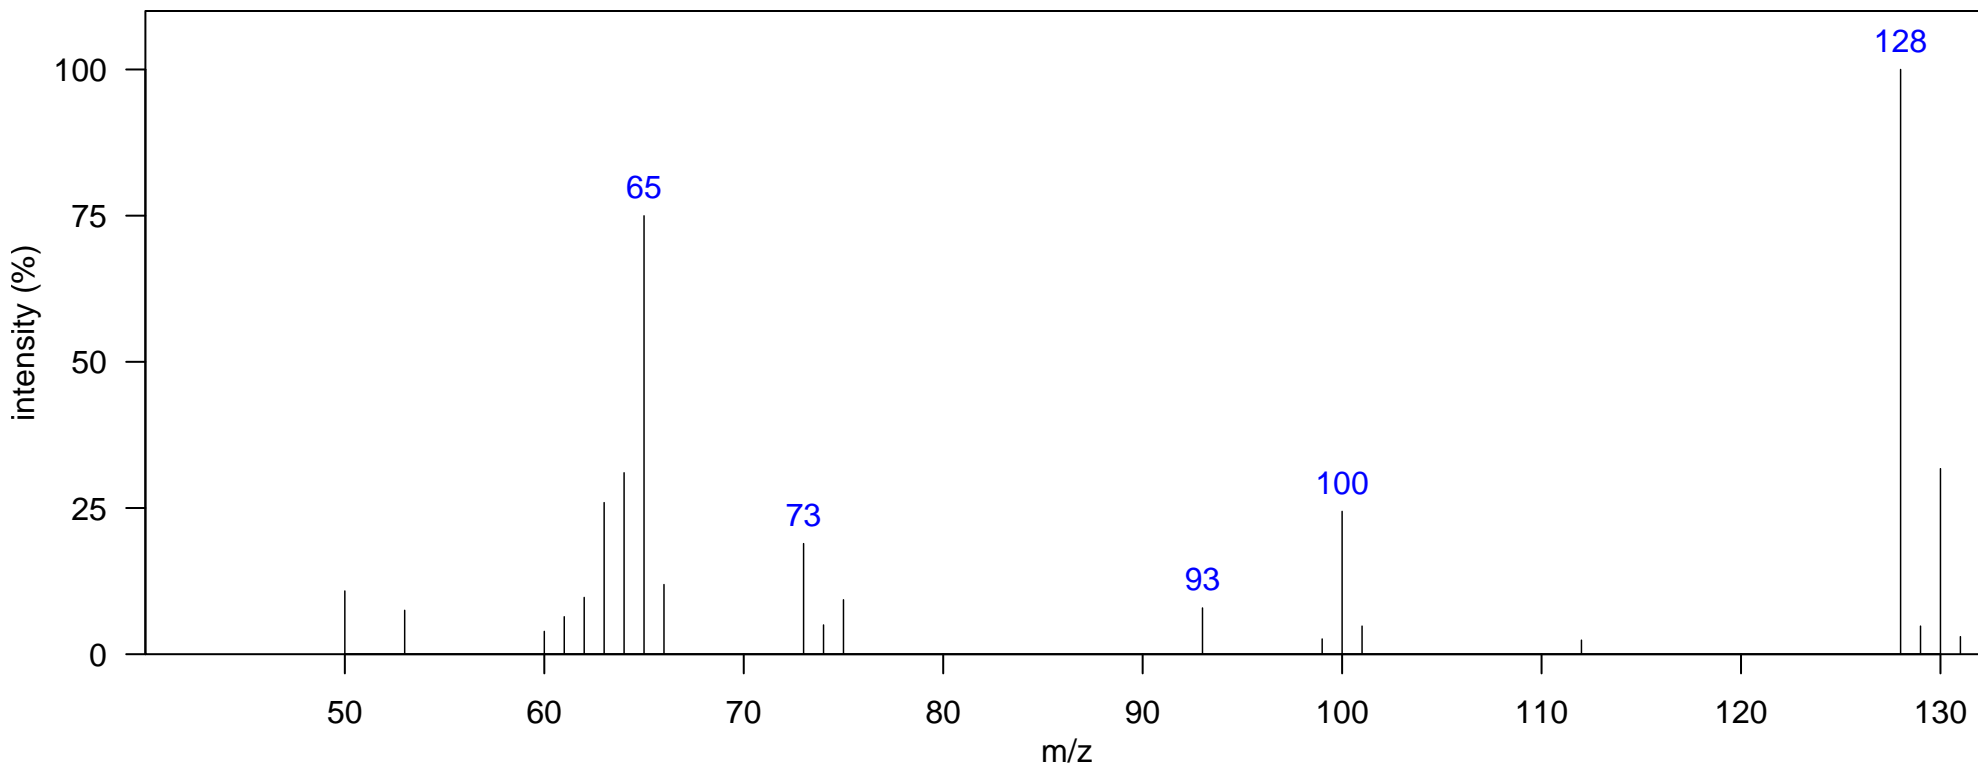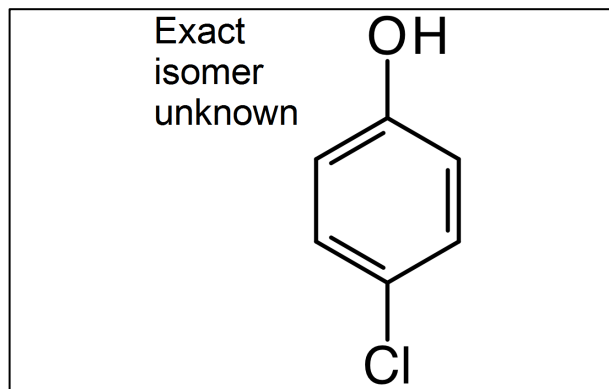

| m/z [Fragment] |
|----------------|
| 128 M+         |

Name: 4-Bromophenol

Class: Phenol N

Matrix: SD Bay Black Skimmer Egg

In Samples: All

Group: Not Typically Monitored

Comment:

Instrument: GCxGC-TOF, EI, 70 eV

1D RT, 2D RT (s): 1065.23, 1.386

Quantitative Ion m/z: 172

Elemental Formula: C<sub>6</sub>H<sub>5</sub>BrO

Source: Natural

Identification: Authentic MS RT

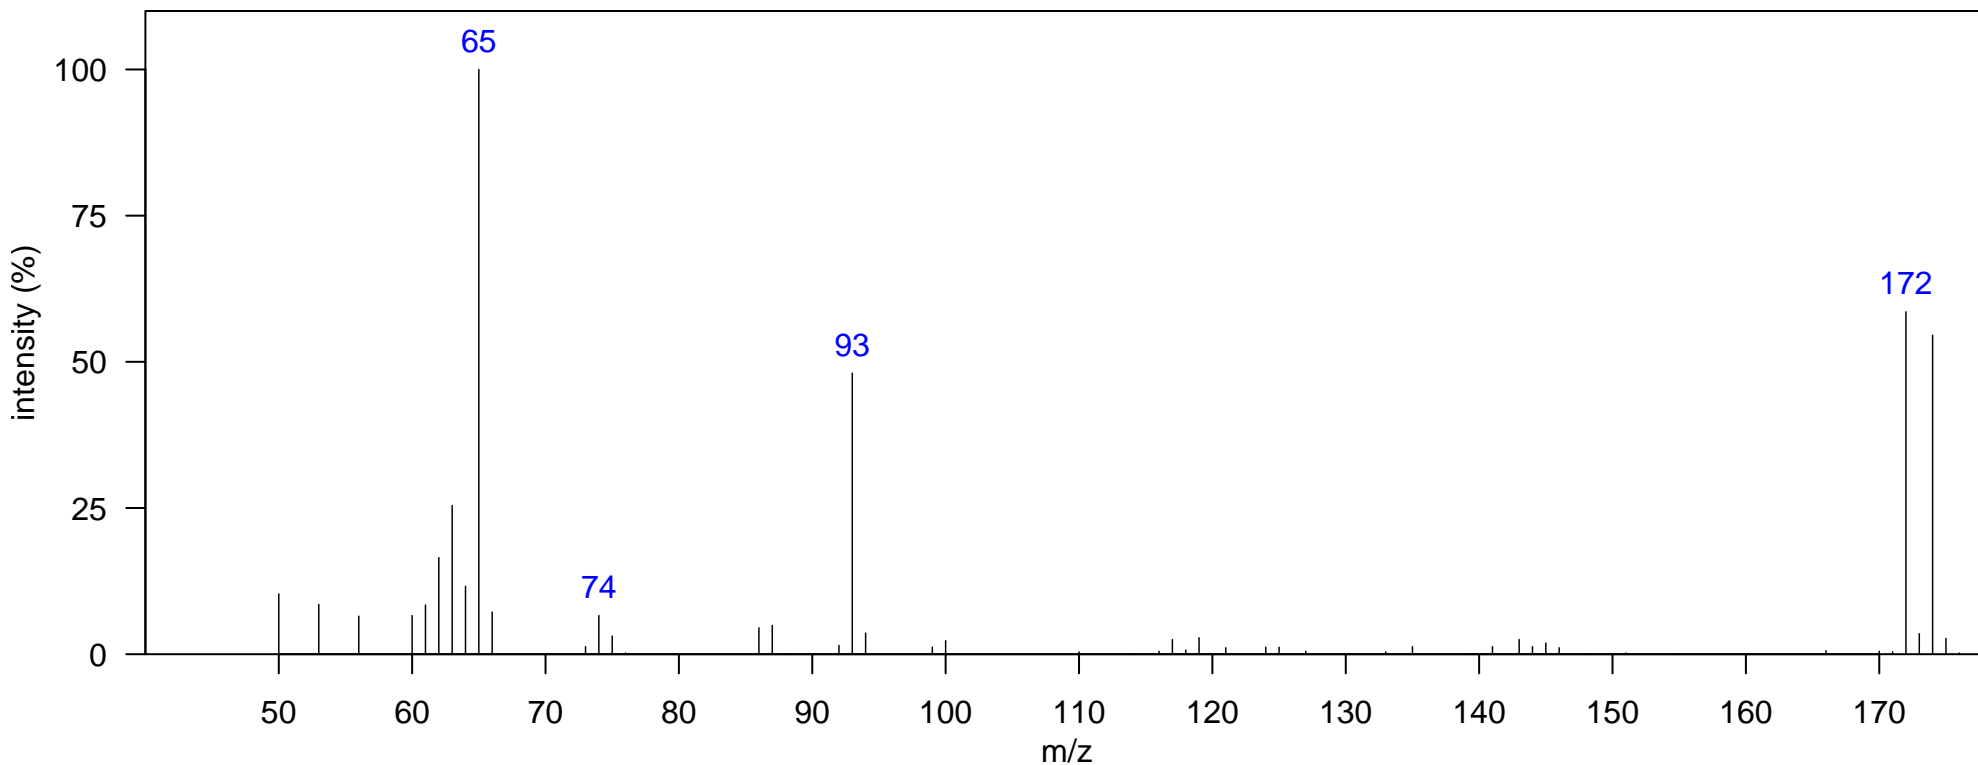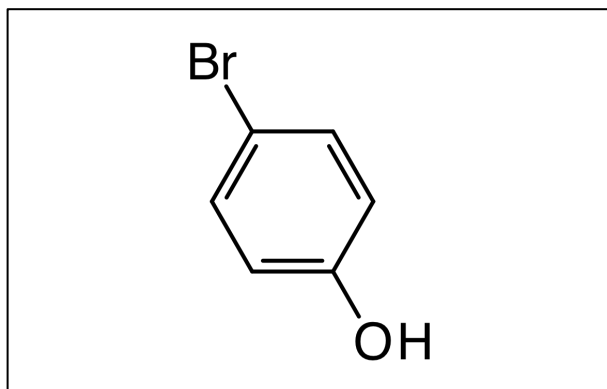

| m/z [Fragment]         |
|------------------------|
| 93 [M-Br] <sup>+</sup> |
| 172 M <sup>+</sup>     |



Name: 4-Chlorocatechol

Class: Phenol A

Matrix: SD Bay Black Skimmer Egg

In Samples: A, B, C

Group: Not Typically Monitored

Comment:

Instrument: GCxGC-TOF, EI, 70 eV

1D RT, 2D RT (s): 1233.14, 1.287

Quantitative Ion m/z: 144

Elemental Formula: C<sub>6</sub>H<sub>5</sub>ClO<sub>2</sub>

Source: Anthropogenic

Identification: Authentic MS RT

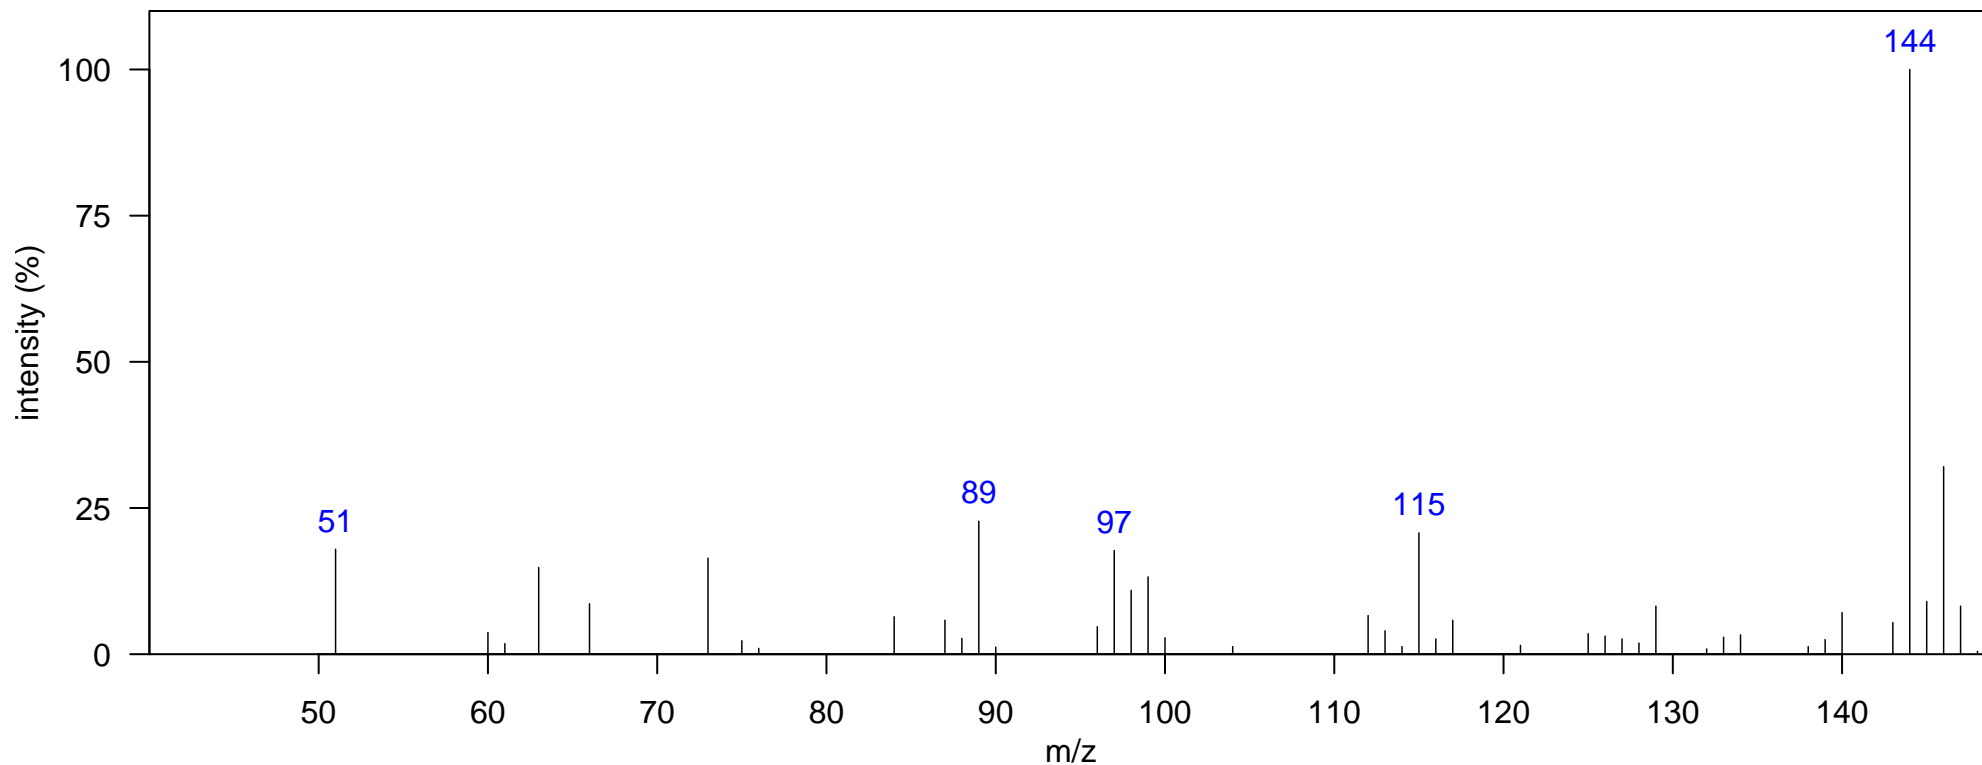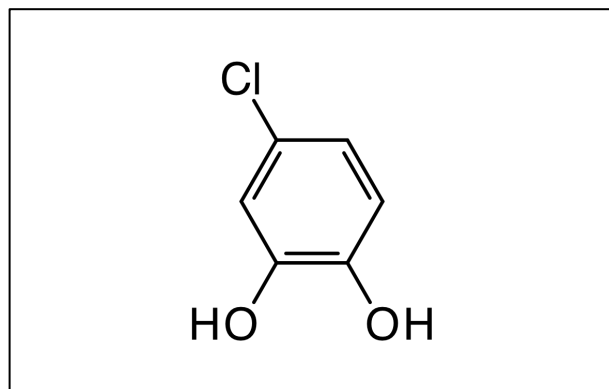

| m/z [Fragment] |
|----------------|
| 144 M+         |

Name: 4-Chlorocatechol isomer

Class: Phenol A

Matrix: SD Bay Black Skimmer Egg

In Samples: A, B, C

Group: Not Typically Monitored

Comment:

Instrument: GCxGC-TOF, EI, 70 eV

1D RT, 2D RT (s): 1355.57, 1.28

Quantitative Ion m/z: 144

Elemental Formula: C<sub>6</sub>H<sub>5</sub>ClO<sub>2</sub>

Source: Anthropogenic

Identification: Authentic MS

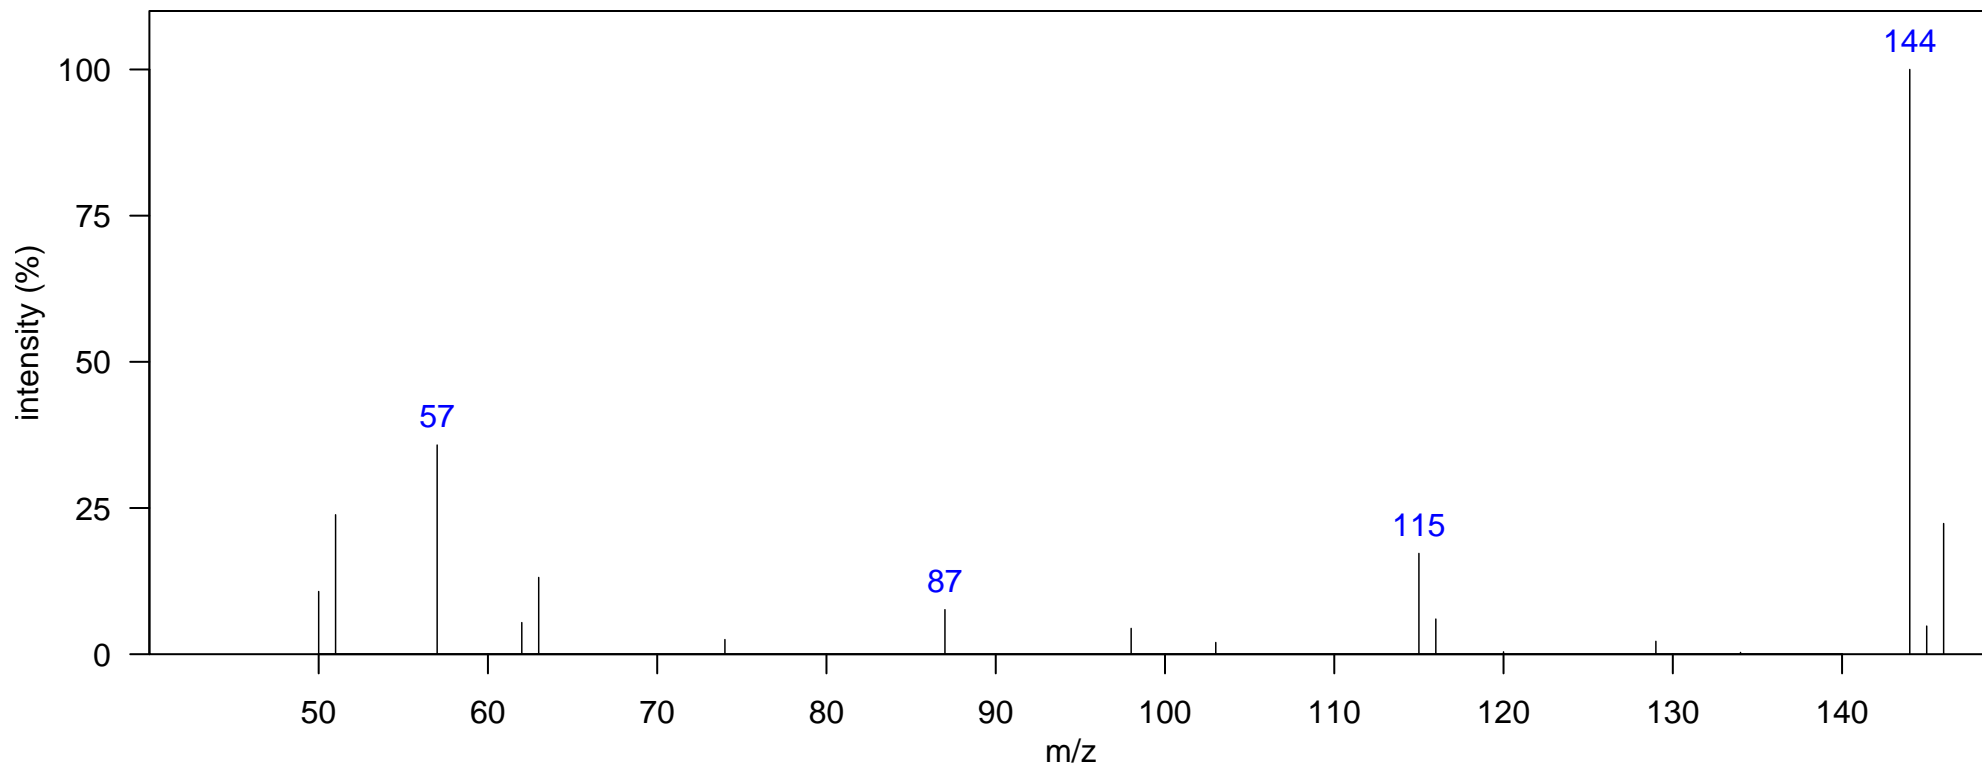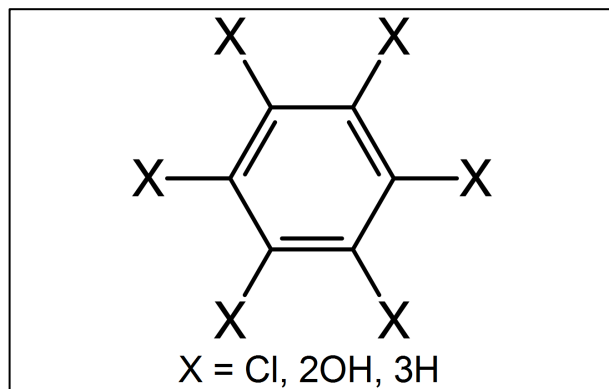

| m/z [Fragment] |
|----------------|
| 144 M+         |

Name: 2,4,6-Tribromoanisole

Class: Phenol M

Matrix: SD Bay Black Skimmer Egg

In Samples: A, C

Group: Not Typically Monitored

Comment:

Instrument: GCxGC-TOF, EI, 70 eV

1D RT, 2D RT (s): 1478, 1.465

Quantitative Ion m/z: 331

Elemental Formula: C<sub>7</sub>H<sub>5</sub>Br<sub>3</sub>O

Source: Mixed

Identification: Authentic MS RT

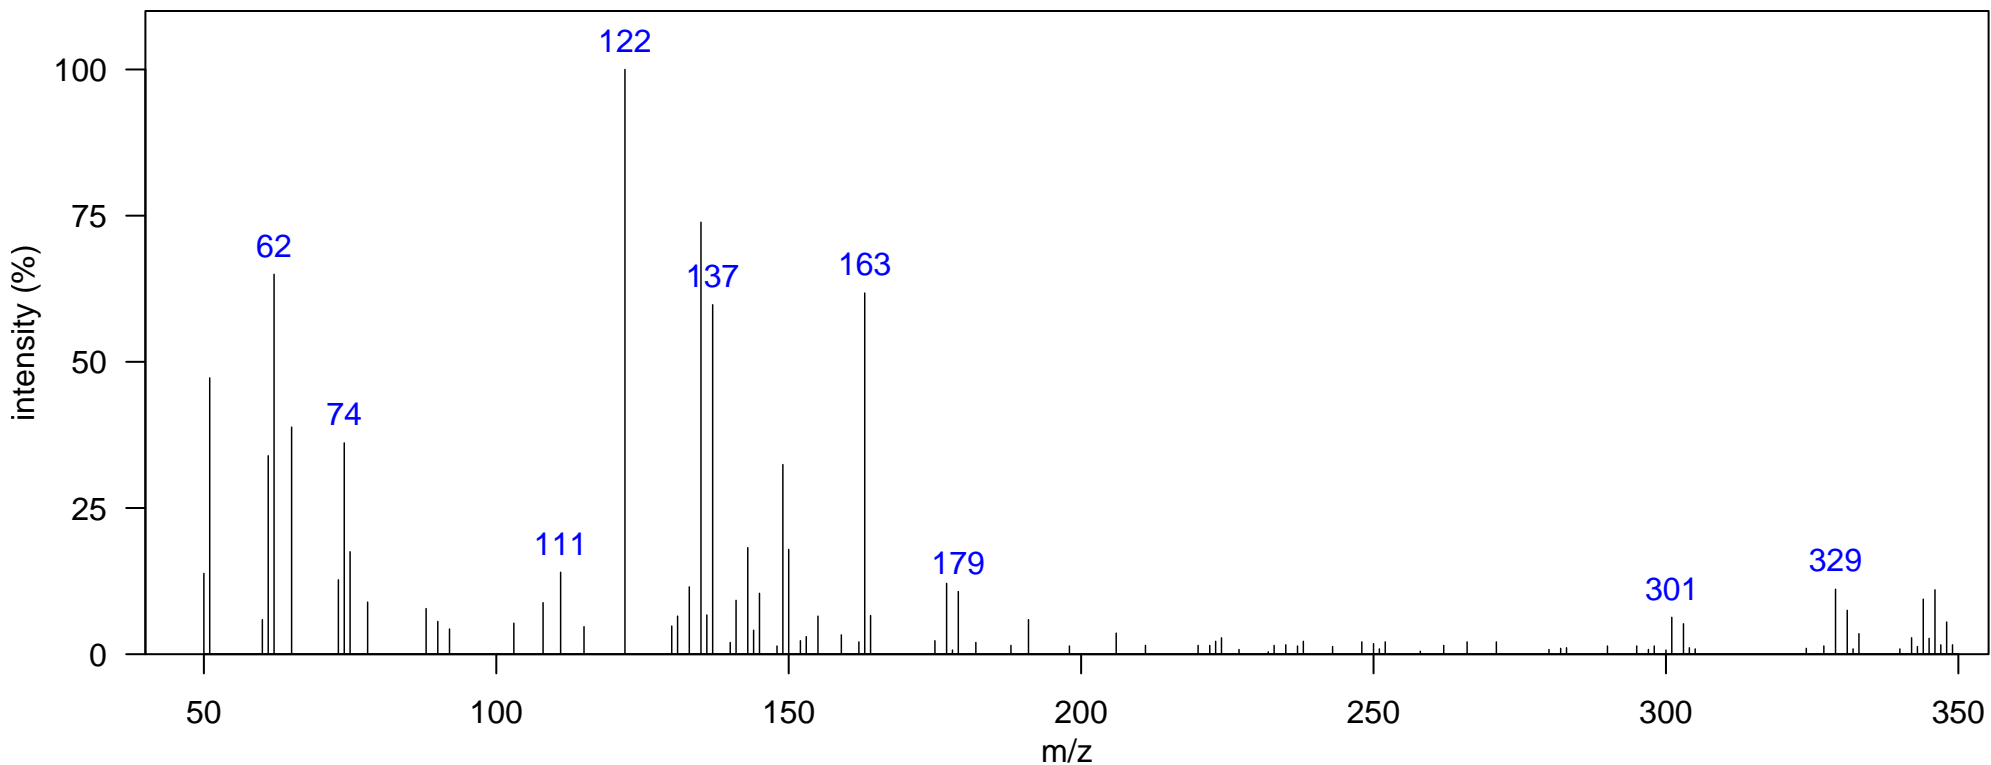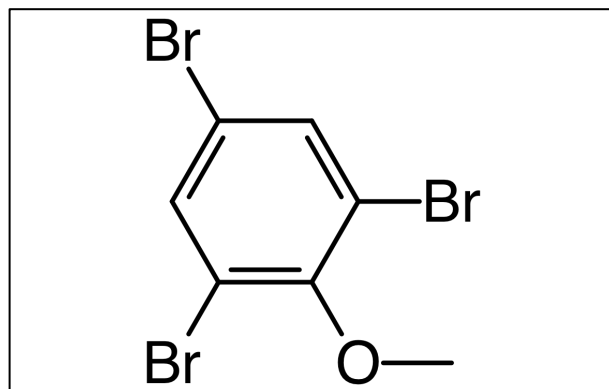

| m/z [Fragment]                                       |
|------------------------------------------------------|
| 299 [M-C <sub>2</sub> H <sub>3</sub> O] <sup>+</sup> |
| 327 [M-CH <sub>3</sub> ] <sup>+</sup>                |
| 342 M <sup>+</sup>                                   |

Name: p-Chloroanisole

Class: Phenol A

Matrix: SD Bay Black Skimmer Egg

Instrument: GCxGC-TOF, EI, 70 eV

Elemental Formula: C<sub>7</sub>H<sub>7</sub>ClO

In Samples: A, C, D

1D RT, 2D RT (s): 1596.93, 1.082

Source: Anthropogenic

Group: Not Typically Monitored

Quantitative Ion m/z: 142

Identification: Reference Database MS

Comment: NIST I.D. is 1-Chloro-4-methoxybenzene.

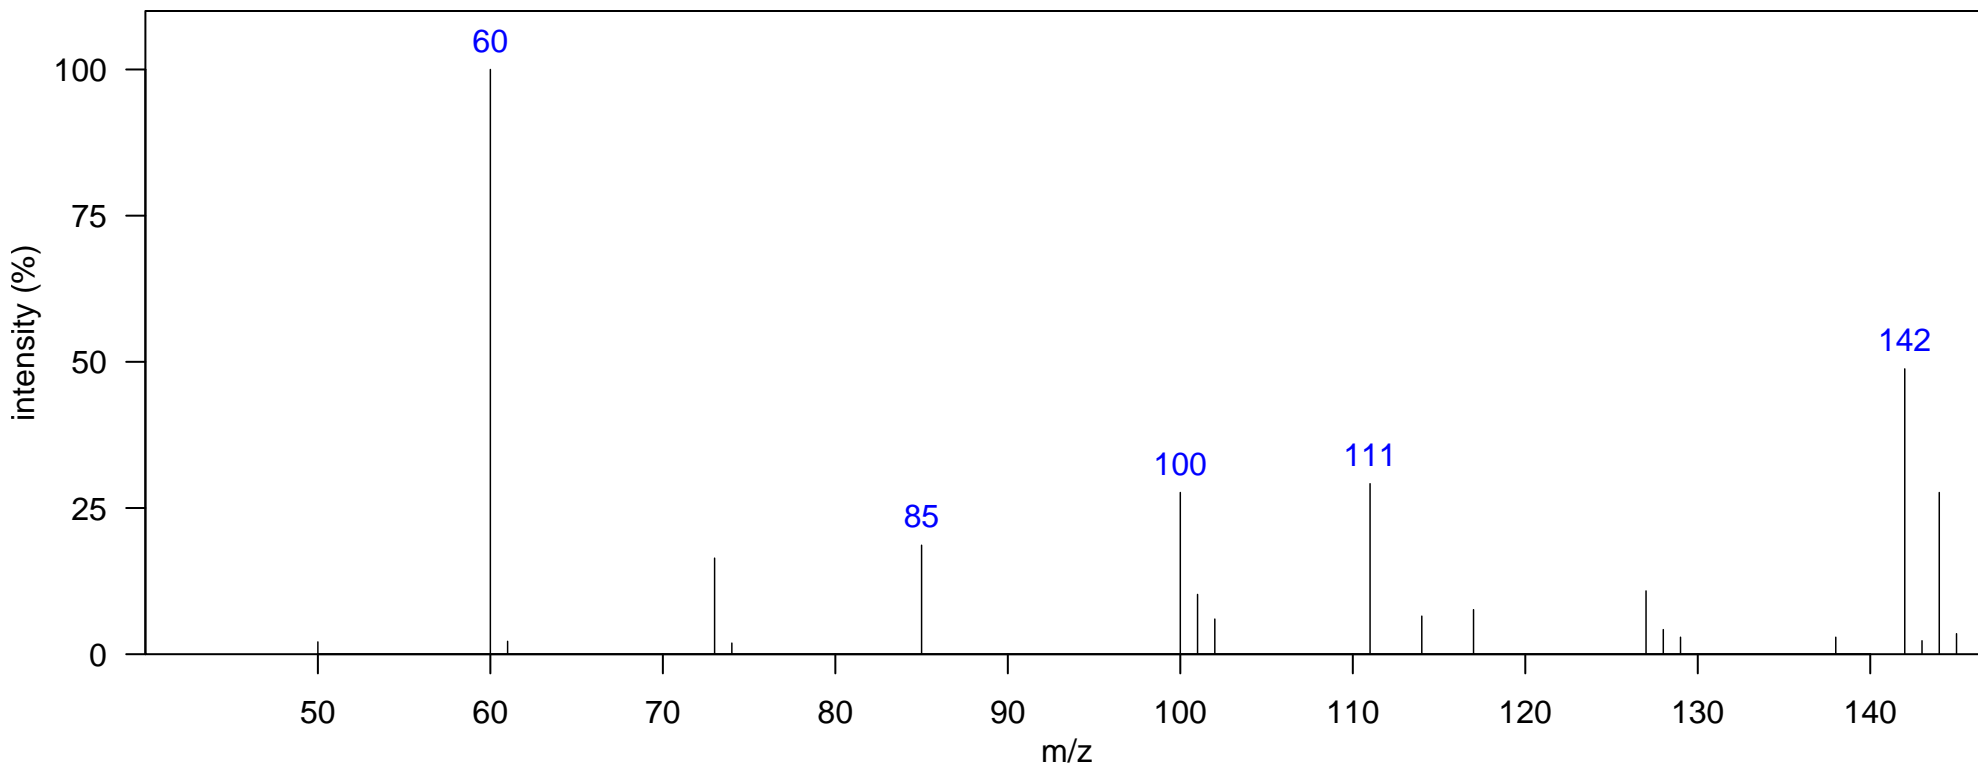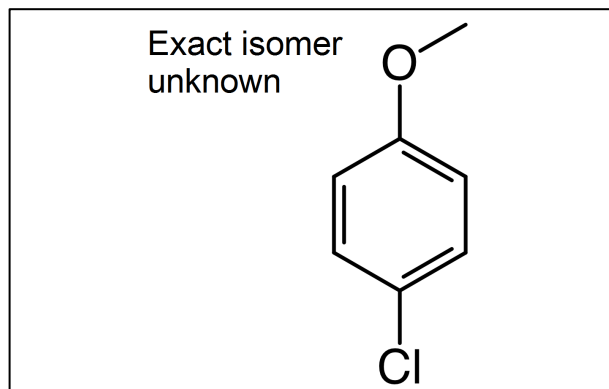

| m/z [Fragment] |
|----------------|
| 142 M+         |

Name: Triclosan

Class: Phenol A

Matrix: SD Bay Black Skimmer Egg

Instrument: GCxGC-TOF, EI, 70 eV

Elemental Formula: C<sub>12</sub>H<sub>7</sub>Cl<sub>3</sub>O<sub>2</sub>

In Samples: All

1D RT, 2D RT (s): 1960.72, 1.61

Source: Anthropogenic

Group: Not Typically Monitored

Quantitative Ion m/z: 288

Identification: Authentic MS RT

Comment:

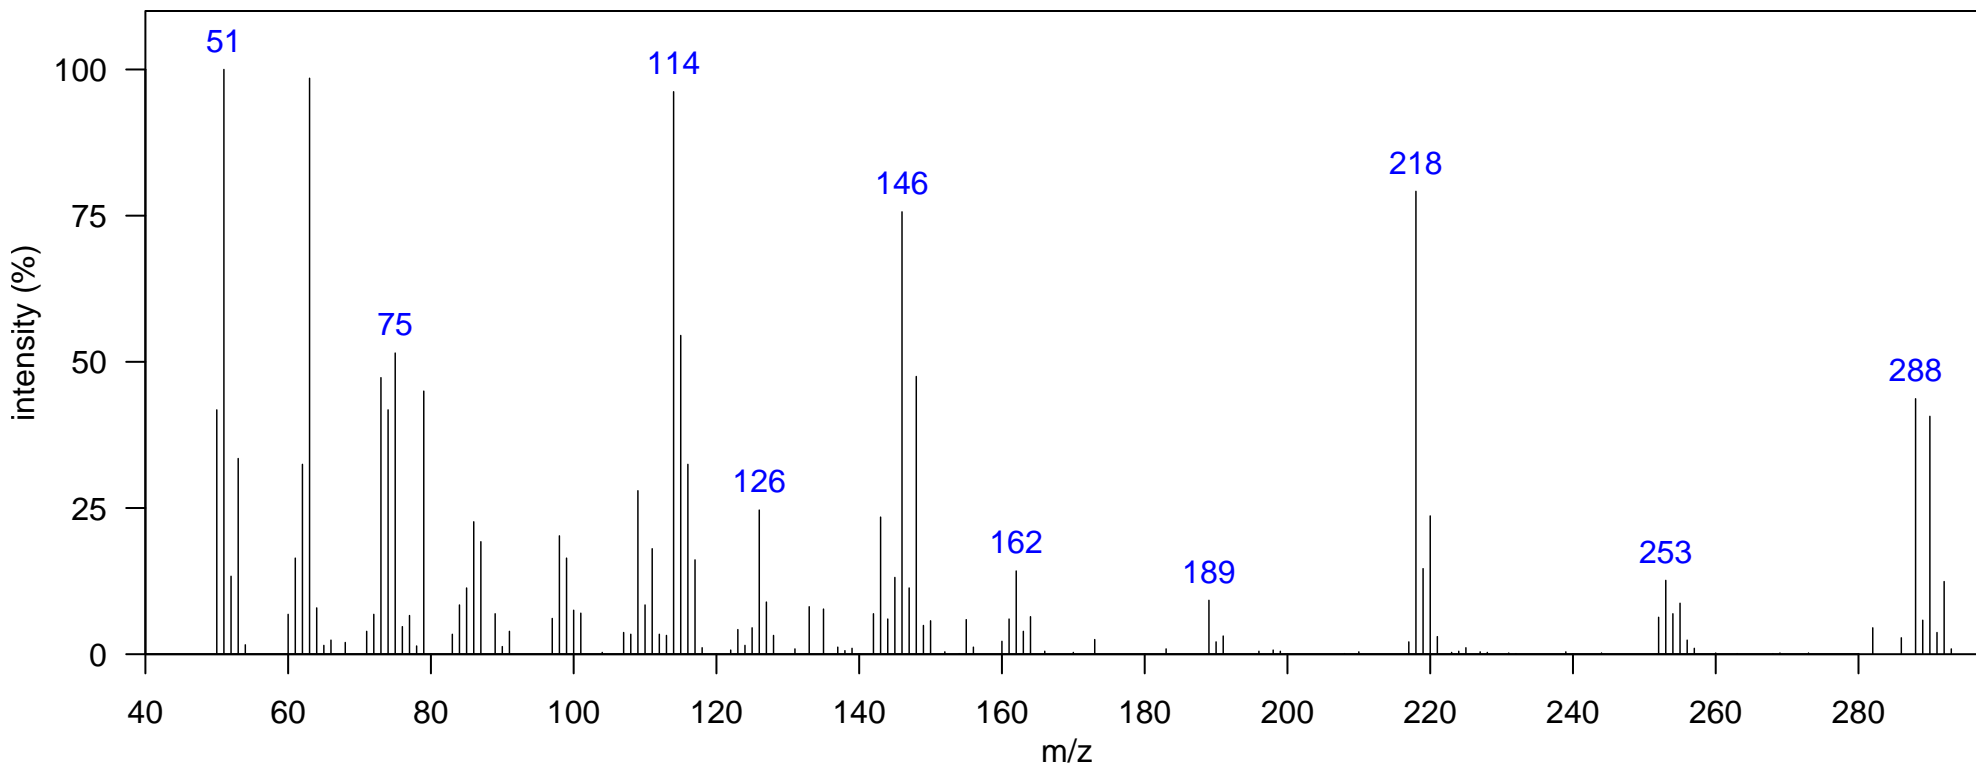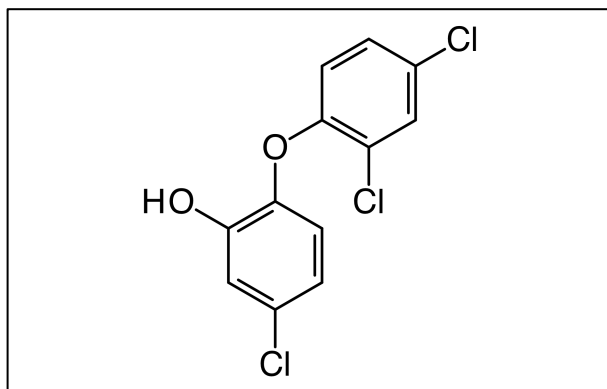

| m/z [Fragment]                        |
|---------------------------------------|
| 218 [M-Cl <sub>2</sub> ] <sup>+</sup> |
| 253 [M-Cl] <sup>+</sup>               |
| 288 M <sup>+</sup>                    |

Name: Permethrin 1

Class: Pyrethroid

Matrix: SD Bay Black Skimmer Egg

In Samples: A, D

Group: Not Typically Monitored

Comment: M+ is not detected.

Instrument: GCxGC-TOF, EI, 70 eV

1D RT, 2D RT (s): 2408.47, 1.855

Quantitative Ion m/z: 183

Elemental Formula: C<sub>21</sub>H<sub>20</sub>Cl<sub>2</sub>O<sub>3</sub>

Source: Anthropogenic

Identification: Authentic MS RT

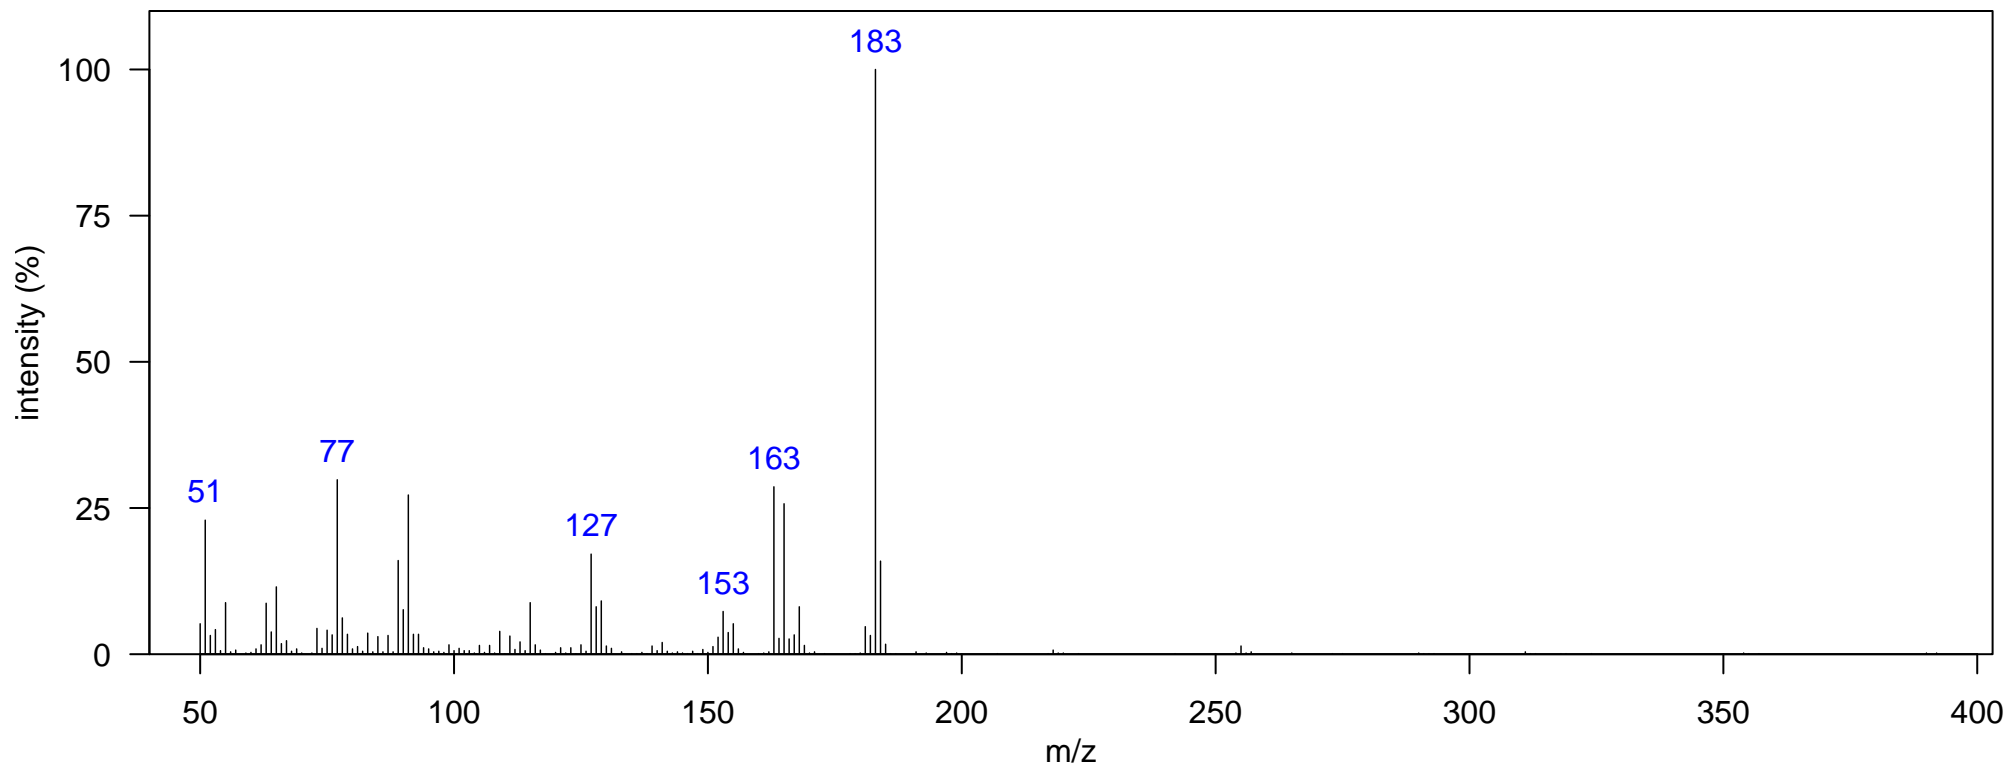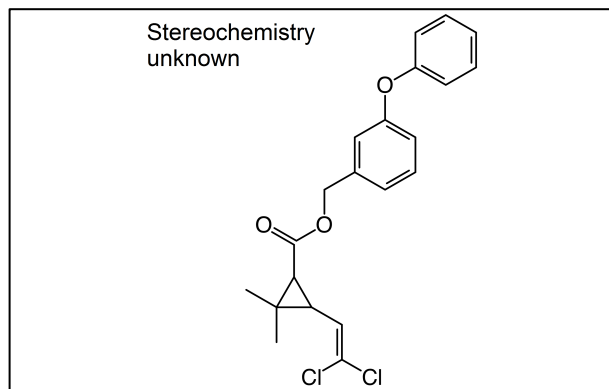

| m/z [Fragment] |
|----------------|
| 390 M+         |

Name: Permethrin 2

Class: Pyrethroid

Matrix: SD Bay Black Skimmer Egg

In Samples: A, D

Group: Not Typically Monitored

Comment: M+ is not detected.

Instrument: GCxGC-TOF, EI, 70 eV

1D RT, 2D RT (s): 2418.96, 1.868

Quantitative Ion m/z: 183

Elemental Formula: C<sub>21</sub>H<sub>20</sub>Cl<sub>2</sub>O<sub>3</sub>

Source: Anthropogenic

Identification: Authentic MS RT

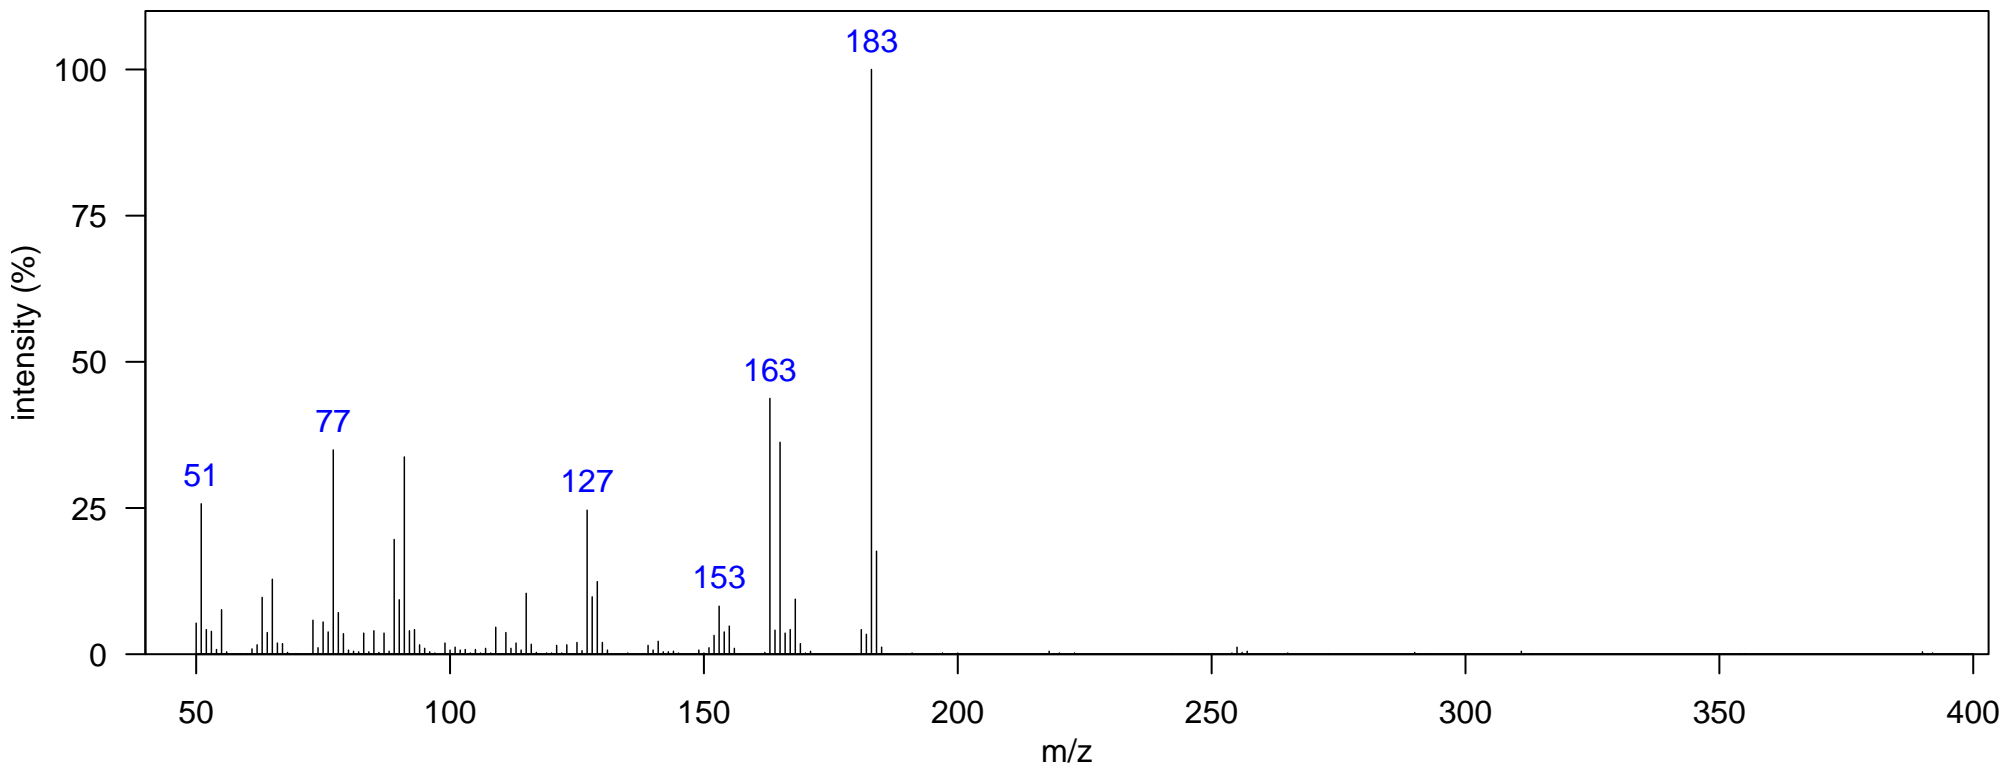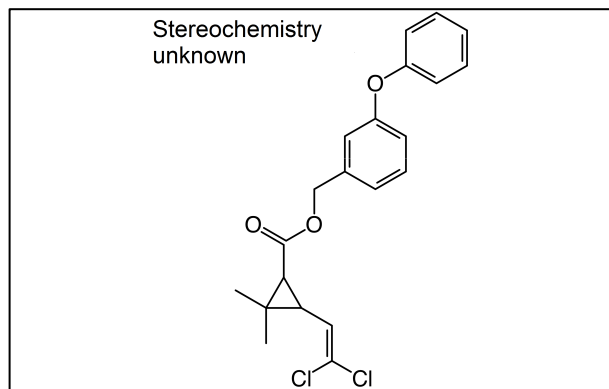

| m/z [Fragment] |
|----------------|
| 390 M+         |

Name: Cypermethrin

Class: Pyrethroid

Matrix: SD Bay Black Skimmer Egg

Instrument: GCxGC-TOF, EI, 70 eV

Elemental Formula: C<sub>22</sub>H<sub>19</sub>Cl<sub>2</sub>NO<sub>3</sub>

In Samples: A

1D RT, 2D RT (s): 2499.41, 1.987

Source: Anthropogenic

Group: Not Typically Monitored

Quantitative Ion m/z: 181

Identification: Reference Database MS

Comment: NIST I.D. is Cypermethrin. M+ is not detected.

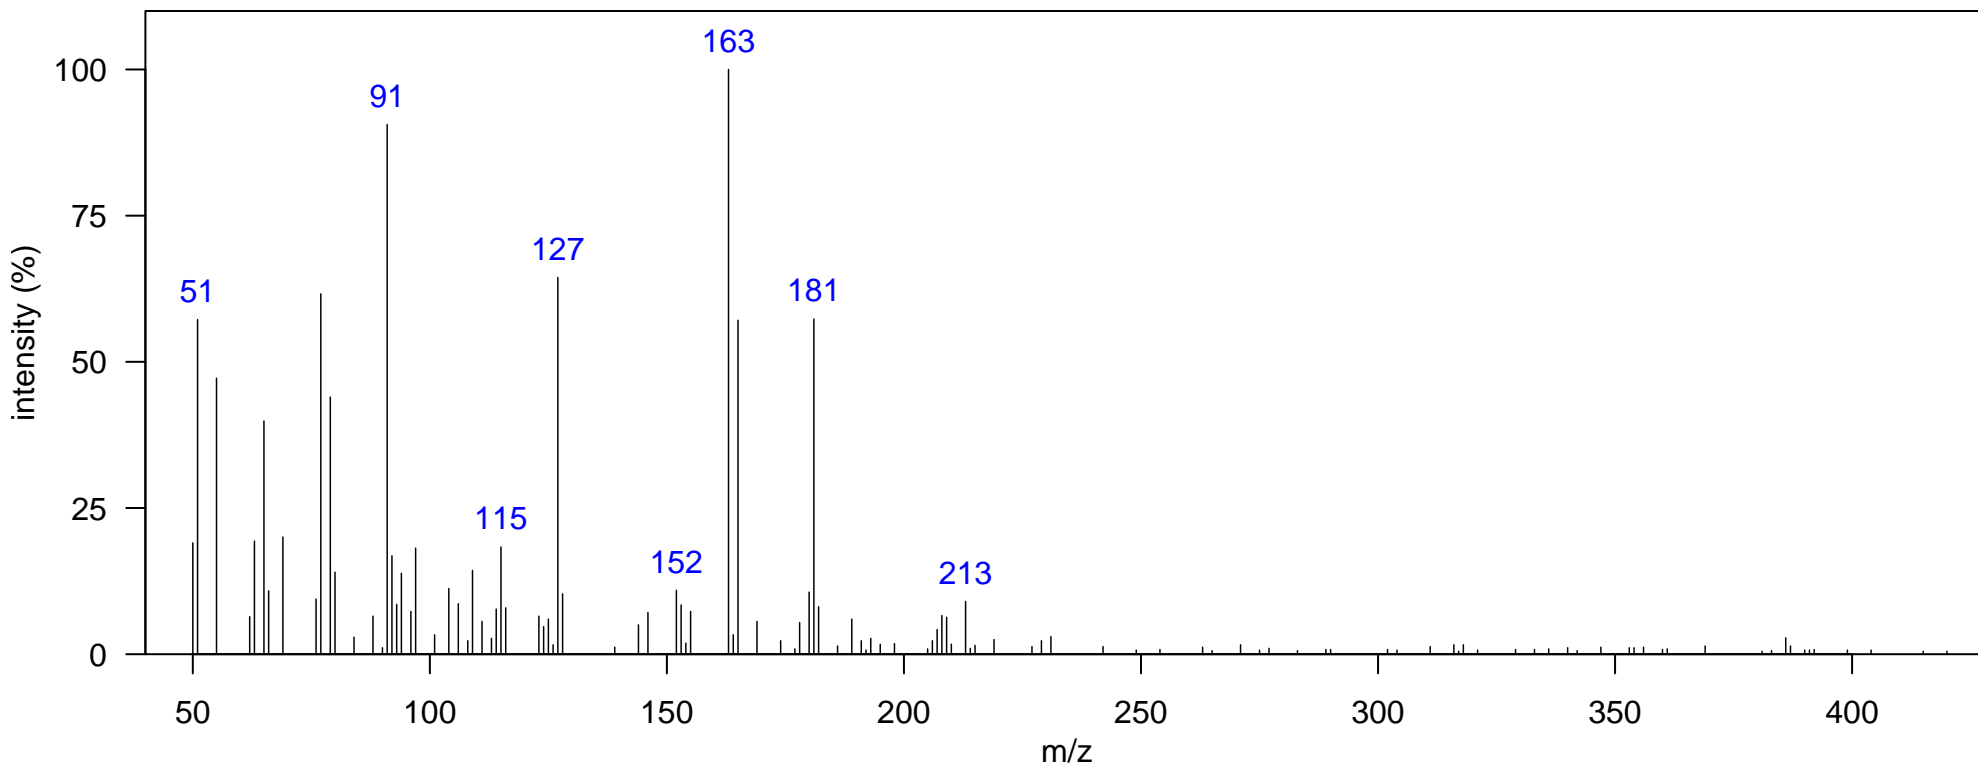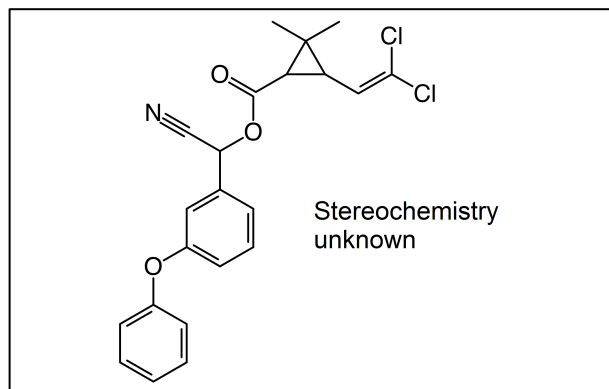

| m/z [Fragment] |
|----------------|
| 415 M+         |



Name: Unknown 1

Class: Unknown

Matrix: SD Bay Black Skimmer Egg  
In Samples: All  
Group: Not Typically Monitored  
Comment:

Instrument: GCxGC-TOF, EI, 70 eV  
1D RT, 2D RT (s): 1089.72, 1.339  
Quantitative Ion m/z: 172

Elemental Formula:  
Source: Unknown  
Identification: Unknown

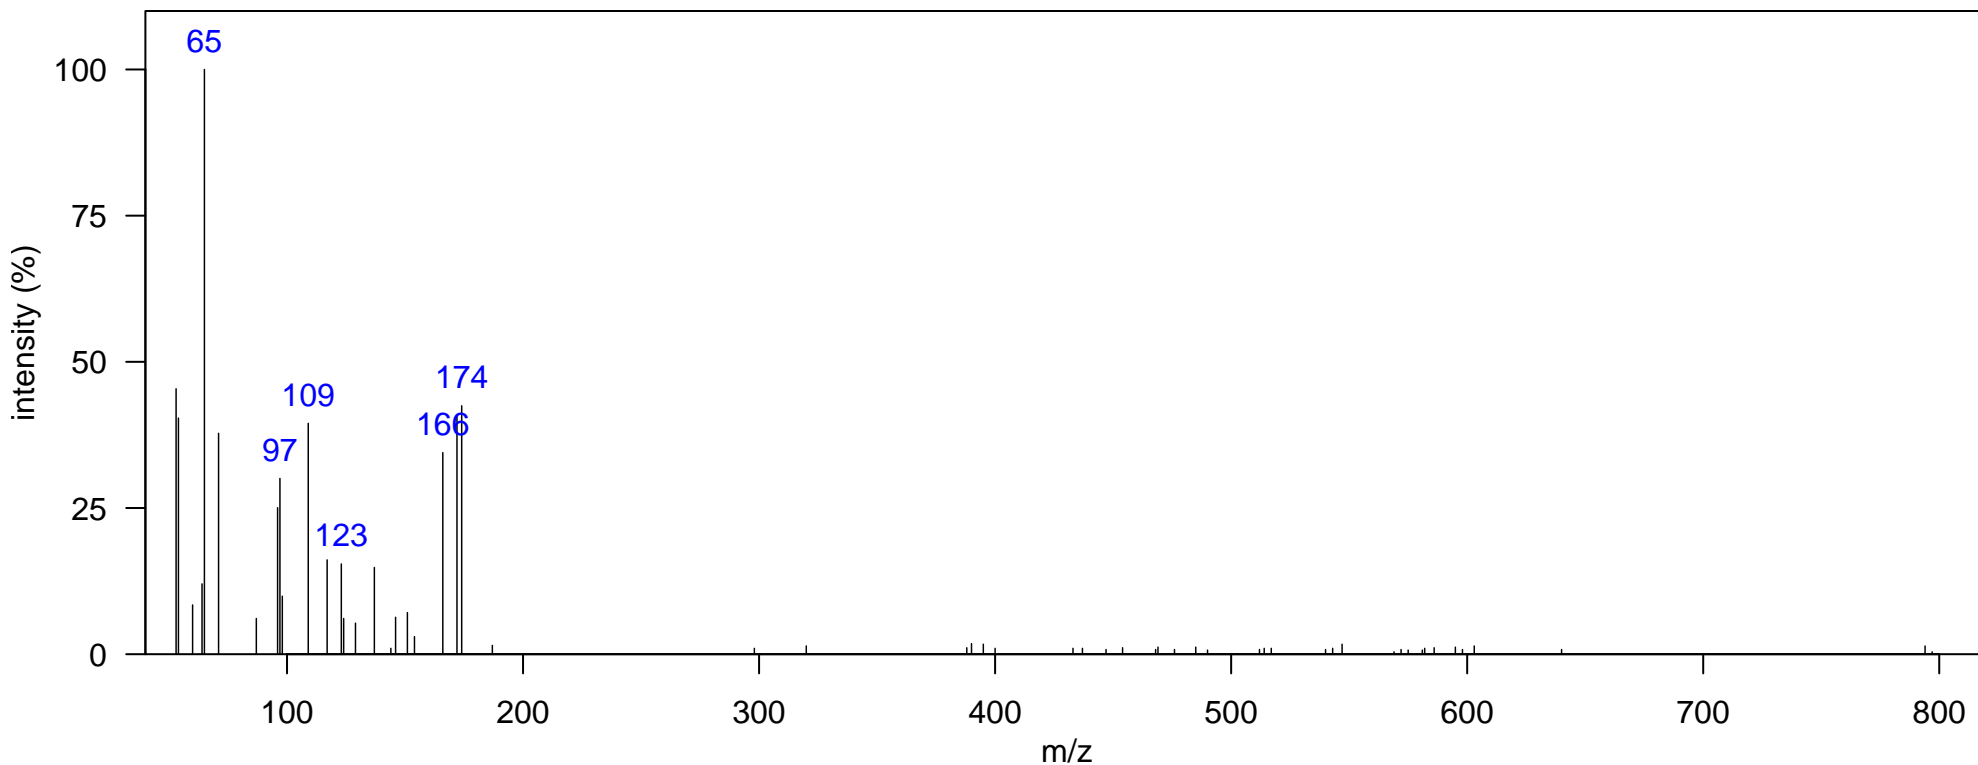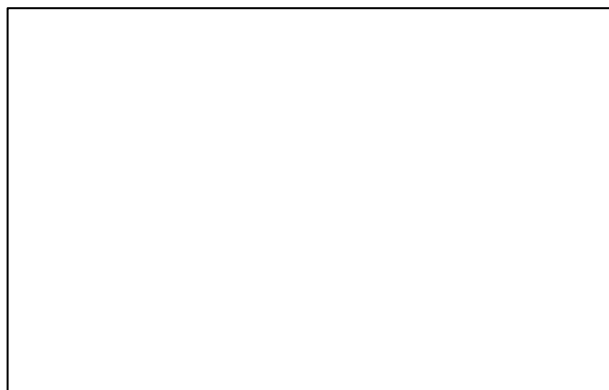

| m/z [Fragment] |
|----------------|
|----------------|

Name: Unknown 2A

Class: Unknown

Matrix: SD Bay Black Skimmer Egg

Instrument: GCxGC-TOF, EI, 70 eV

Elemental Formula:

In Samples: All

1D RT, 2D RT (s): 1645.9, 1.445

Source: Unknown

Group: Not Typically Monitored

Quantitative Ion m/z: 186

Identification: Unknown

Comment:

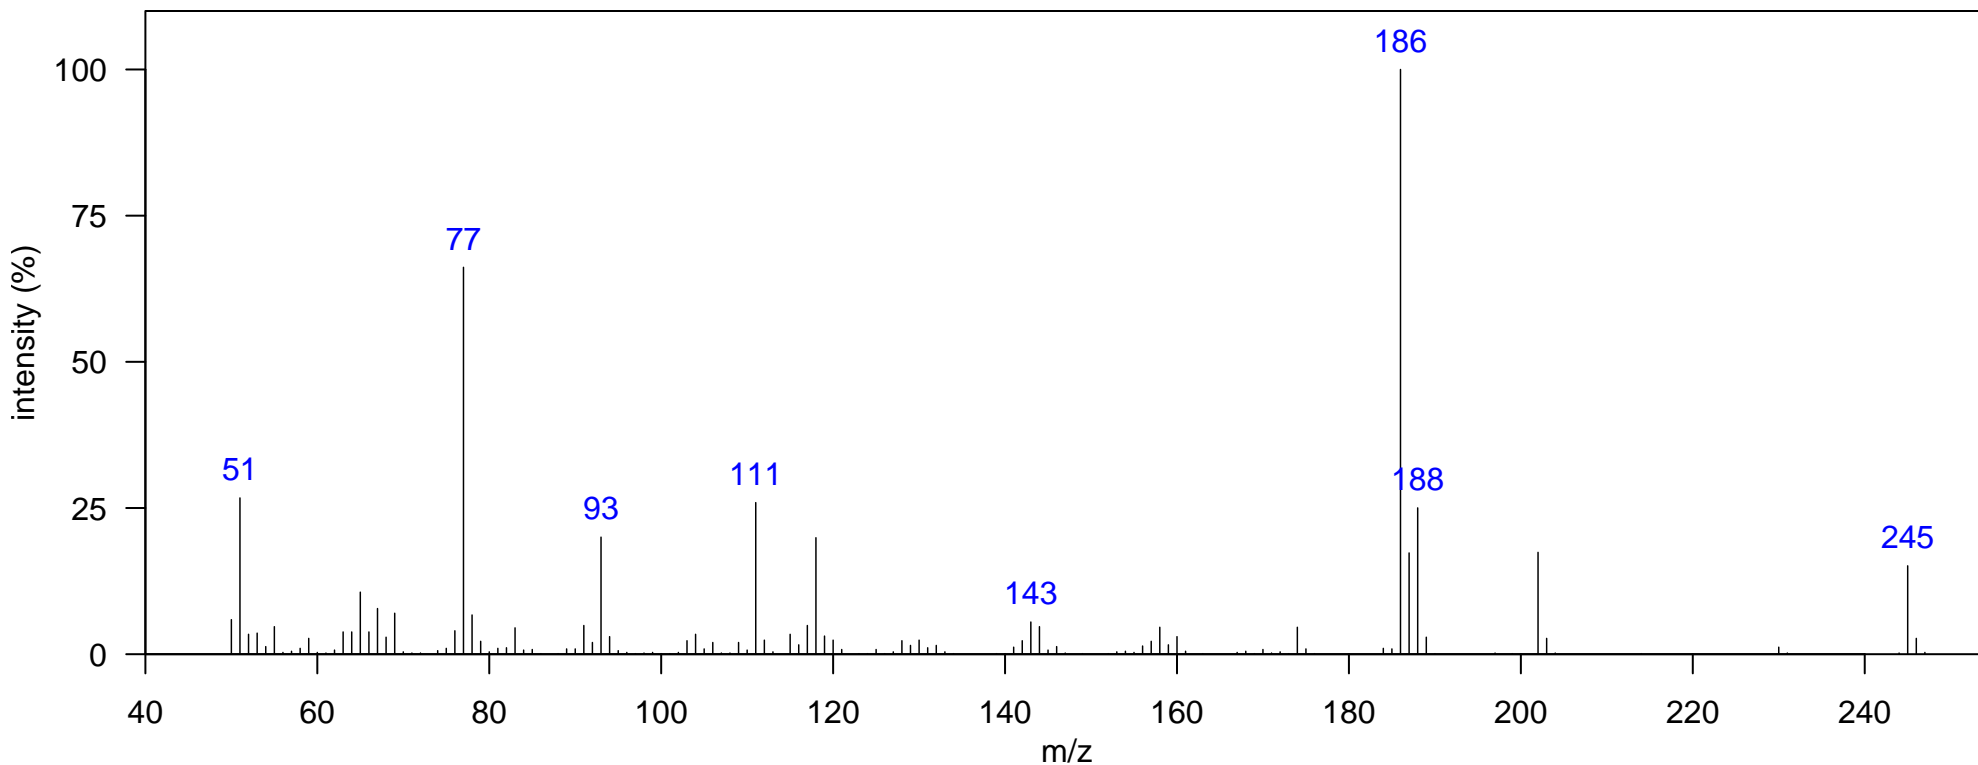

| m/z [Fragment] |
|----------------|
|----------------|

Name: Unknown 2B

Class: Unknown

Matrix: SD Bay Black Skimmer Egg

Instrument: GCxGC-TOF, EI, 70 eV

Elemental Formula:

In Samples: All

1D RT, 2D RT (s): 1736.85, 1.432

Source: Unknown

Group: Not Typically Monitored

Quantitative Ion m/z: 186

Identification: Unknown

Comment:

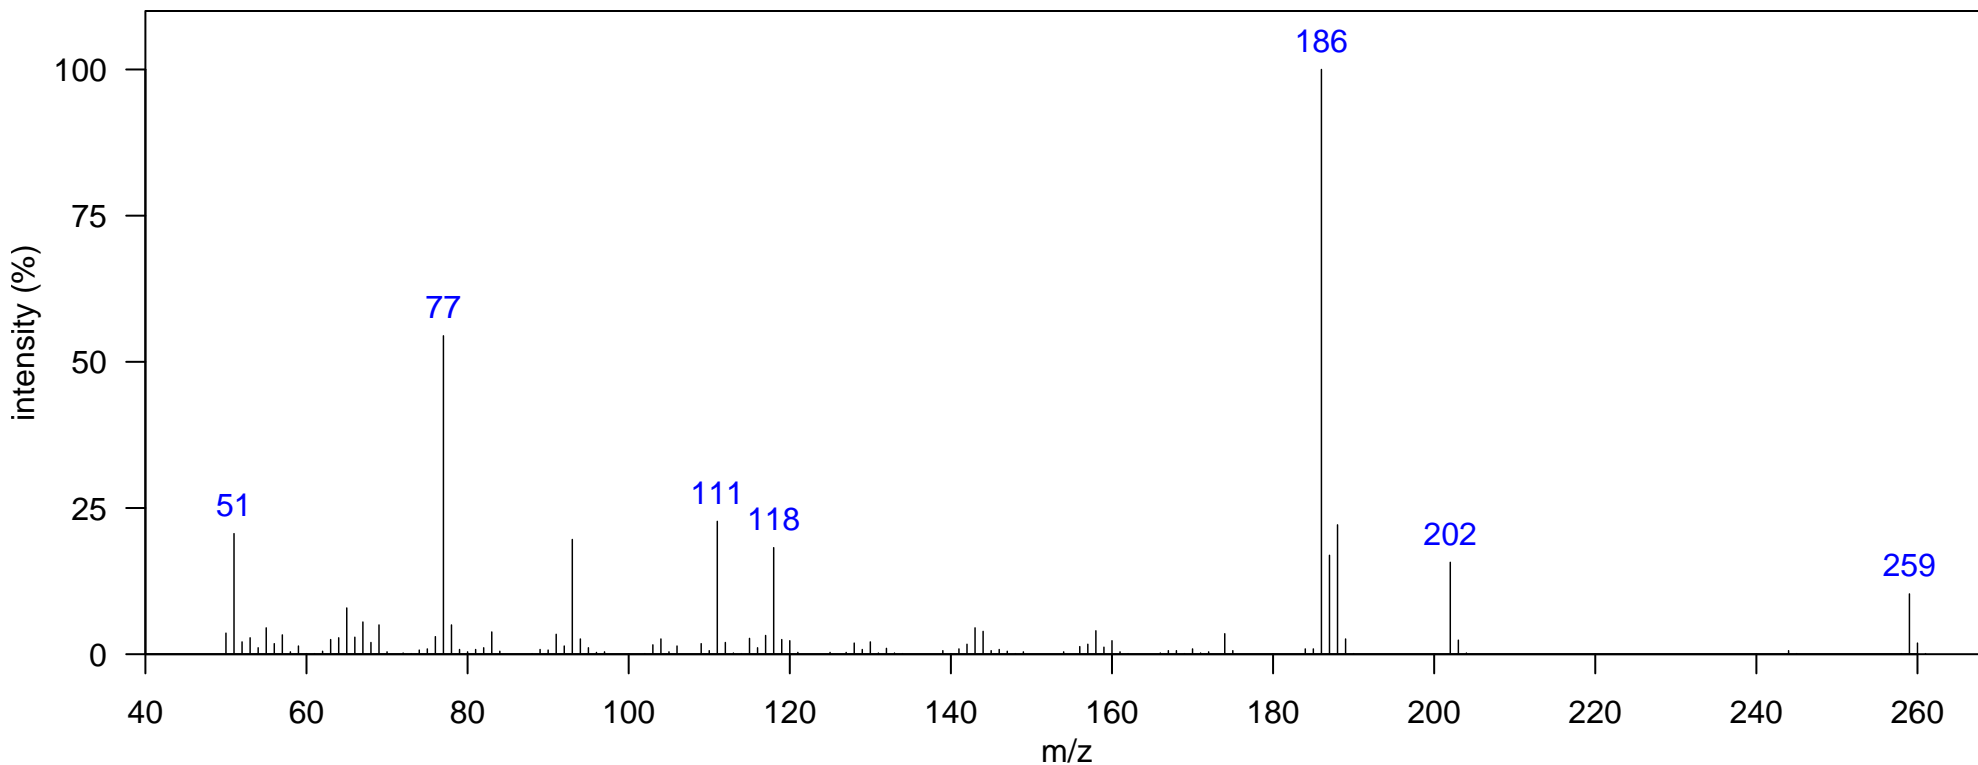

| m/z [Fragment] |
|----------------|
|----------------|

Name: Unknown 3

Class: Unknown

Matrix: SD Bay Black Skimmer Egg

Instrument: GCxGC-TOF, EI, 70 eV

Elemental Formula:

In Samples: All

1D RT, 2D RT (s): 2167.1, 1.656

Source: Unknown

Group: Not Typically Monitored

Quantitative Ion m/z: 282

Identification: Unknown

Comment:

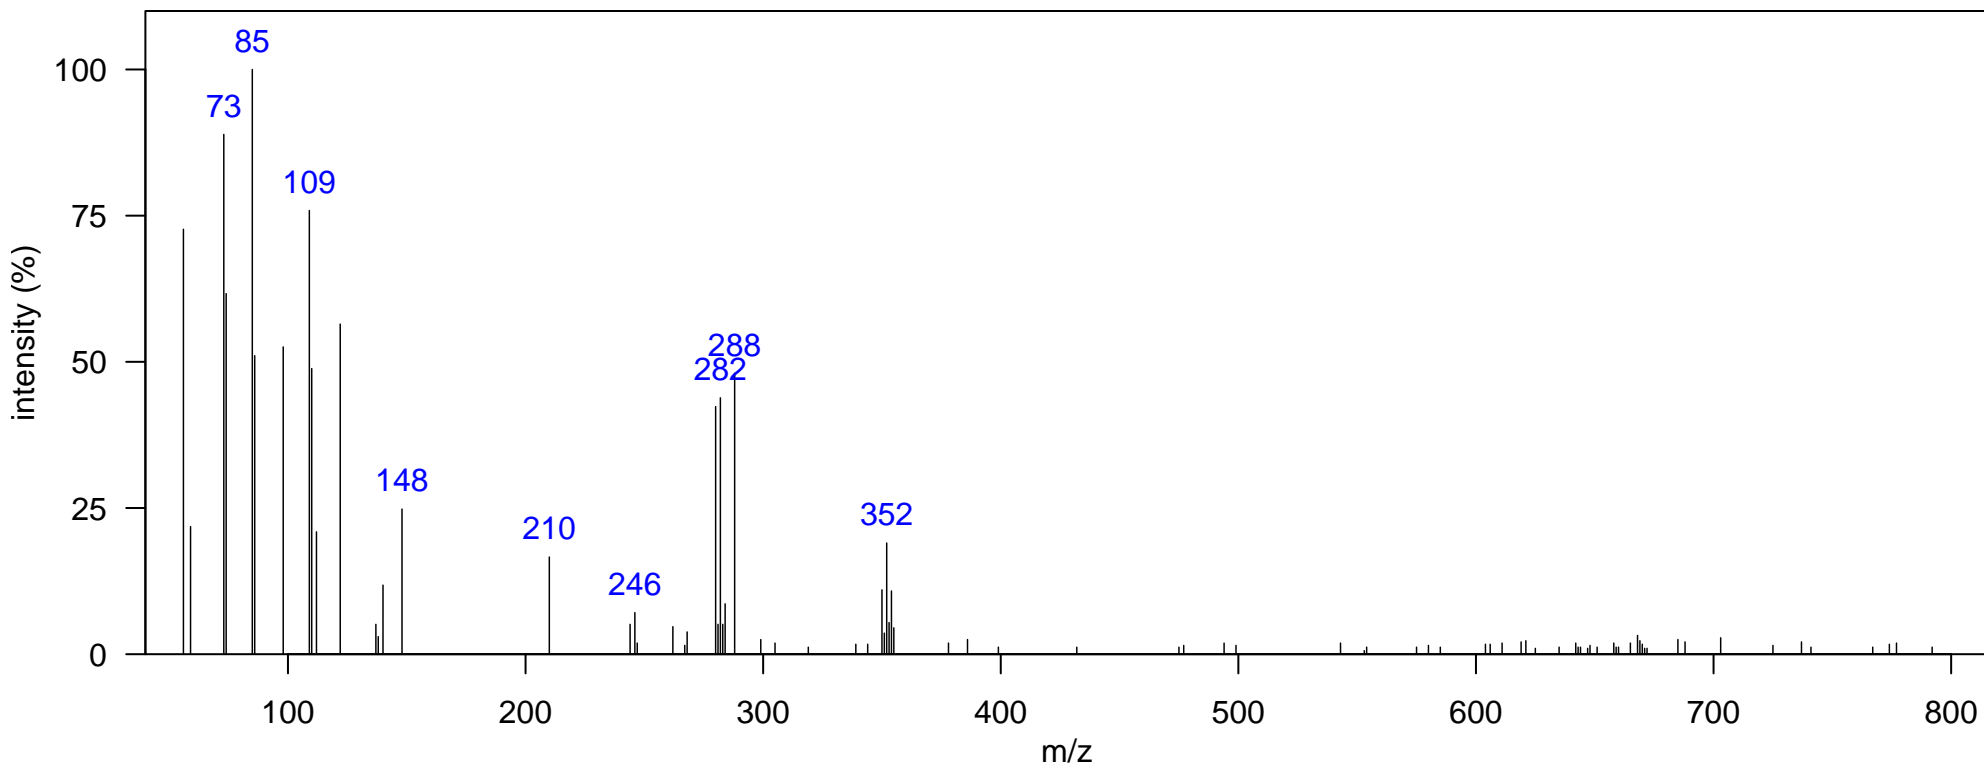

| m/z [Fragment] |
|----------------|
|----------------|
